1 *Macrobdella decora*: Old World Leech Gut Microbial Community Structure Conserved in a New  
2 World Leech

3

4 Emily Ann McClure<sup>a</sup>, Michael C. Nelson<sup>a</sup>, Amy Lin<sup>a</sup>, Joerg Graf<sup>a,b,#</sup>

5

6 <sup>a</sup>Department of Molecular and Cell Biology, University of Connecticut, Storrs, Connecticut,  
7 U.S.A.

8 <sup>b</sup>Institute for Systems Genomics, University of Connecticut, Storrs, Connecticut, U.S.A.

9

10 Running Head: *Macrobdella decora* Conserved Symbionts

11

12 #Address correspondence to Joerg Graf, [Joerg.graf@uconn.edu](mailto:Joerg.graf@uconn.edu)

13 \*Present address: Sema4 Genomics, Branford, Connecticut, U.S.A..

14

15

16

17

18

19

20

21

22

23

24 **ABSTRACT**

25 Leeches are found in terrestrial, aquatic, and marine habitats on all continents. Sanguivorous  
26 leeches have been used in medicine for millennia. Modern scientific uses include studies of  
27 neurons, anticoagulants, and gut microbial symbioses. *Hirudo verbana*, the European medicinal  
28 leech, maintains a gut community dominated by two bacterial symbionts, *Aeromonas veronii* and  
29 *Mucinivorans hirudinis*, which sometimes account for as much as 97% of the total crop  
30 microbiota. The highly simplified gut anatomy and microbiome of *H. verbana* make it an  
31 excellent model organism for studying gut microbial dynamics. The North American medicinal  
32 leech, *Macrobdella decora*, is a hirudinid leech native to Canada and the northern U.S.A. In this  
33 study we show that *M. decora* symbiont communities are very similar to those in *H. verbana*.  
34 This similarity allowed for an extensive study in which wild caught animals were sampled to  
35 determine effects of geographic separation, time of collection, and feeding on the microbiome.  
36 Through 16S V4 rRNA deep sequencing we show that: i) the *M. decora* gut and bladder  
37 microbial communities are distinct, ii) the *M. decora* gut community is affected by feeding and  
38 long periods of starvation, and iii) geographic separation does not appear to affect the overall gut  
39 microbial community structure. We propose that *M. decora* is a replacement for *H. verbana* for  
40 studies of wild-caught animals and offer evidence for the conservation of annelid symbionts.  
41 Successful culturing and comparison of dominant symbionts from *M. decora* and *H. verbana*  
42 will provide the ability to assess host-symbiont co-evolution in future work.

43

44

45

46 **IMPORTANCE**

47 Building evidence implicates the gut microbiome in regulating animal digestion, nutritional  
48 acquisition, immune regulation, development, and even mood regulation. Because of the  
49 difficulty of assigning causative relationships in complex gut microbiomes a simplified model  
50 for testing hypotheses is necessary. Previous research in *Hirudo verbana* has suggested this  
51 animal as a highly simplified and tractable animal model of gut symbioses. Our data show that  
52 *Macrobdella decora* may work just as well as *H. verbana* without the drawback of being an  
53 endangered organism and with the added convenience of easy access to field-caught specimens.  
54 The similarity of the microbial community structure of species from two different continents  
55 reveals the highly-conserved nature of the microbial symbionts in sanguivorous leeches and  
56 confirms the medicinal leech as a highly simplified, natural animal model in which to study gut  
57 symbioses.

58

59

## 60 **INTRODUCTION**

61 Leeches are a diverse animal group capable of surviving in freshwater, marine, and terrestrial  
62 environments. They are found on all continents and oceans on planet Earth (1, 2). Records of  
63 humans applying leeches medicinally survive from populations as far back as ancient Egypt (3,  
64 4), resulting in the name medicinal leech, *Hirudo medicinalis* Linnaeus, 1758. As our  
65 understanding of hirundinid taxonomy improved, *Hirudo medicinalis* was subdivided into  
66 additional species including *H.verbana* Carena 1820 and *H.orientalis* Utevsky & Trontelj, 2005  
67 (5, 6). Since 2004 in the United States, only *H. medicinalis* and *H. verbana* are approved for use  
68 as a medical device and must be shipped from suppliers in Europe (5). Although it shares the  
69 same common name, the North American medicinal leech, *Macrobdella decora*, was rarely used

70 for blood letting. No mechanical or pharmaceutical product has yet been able to replicate the  
71 reduction of venous congestion achieved by the medical application of *Hirudo* leeches (briefly  
72 reviewed in (7)). This results in a continued need for medicinal leeches and a better  
73 understanding of their biology.

74  
75 As approved medical devices, the natural feeding habits of leeches are exploited to reduce  
76 venous congestion and improve blood circulation in affected patients. To make the most out of  
77 unpredictable encounters with prey, hirudinid leeches consume up to five times their body  
78 weight in one feeding and can go up to 6-12 months between feedings (1). After initial  
79 attachment, the leech stimulates blood flow in the prey by secreting vasodilators and a number of  
80 anticoagulant peptides including hirudin and orthologues (8-11). The gastrointestinal system of  
81 *H. verbana* is highly simplified and consists of a pharynx, crop, and intestinum (1, 7). Once  
82 consumed, excess ions and water are rapidly removed from the blood meal to form a highly  
83 viscous intraluminal fluid (ILF) in the crop (7, 12). ILF remains in the crop over long periods of  
84 time before it slowly passes into the intestinum where it is digested (7).

85  
86 The gut microbiome of medicinal leeches is especially simple when compared to common  
87 mammalian gastrointestinal models. Previous research described an ILF microbiota in *H.*  
88 *verbana* dominated by *Aeromonas veronii* and *Mucinivorans hirudinis* (9, 13-17). Subsequent  
89 studies revealed the presence of additional *Aeromonas* spp in *H. verbana* and other hirudinid  
90 leeches (18-20). *Clostridial* species have also been detected in culture-independent studies of the  
91 ILF of *H. verbana* (14, 21) and *H. orientalis* (20). Several functions for the dominant crop  
92 microbiota have been proposed including providing essential nutrients to the host (9, 22, 23),

93 preventing other bacteria from colonizing, inhibiting putrefaction of the ILF (24), aiding the  
94 host's immune responses (25, 26), or initiating the digestion of erythrocytes (27).

95

96 In most animals, the diversity of the microbiome increases along the length of the digestive tract  
97 and similar findings have been reported for *Hirudo* spp. The intestinum contains Alpha-,  
98 Gamma-, and Delta-proteobacteria, *Fusobacteria*, *Firmicutes*, and Bacteroidetes as well as  
99 *Aeromonas* and *Mucinivorans* (14). A number of closely related hirudiniform leech species have  
100 also tested positive for *Aeromonas* and Bacteroidetes from the digestive tract (8, 19, 20). The  
101 composition of the microbial community among the different *Hirudo* species studied is similar in  
102 both crop and intestinum (14, 17, 19, 20).

103

104 Unlike humans but similar to other annelids (28, 29) the bladder of *H. verbana* is colonized by a  
105 number of microbial species (30). Sequence analysis and fluorescence *in situ* hybridization  
106 micrographs of the *H. verbana* bladder show a stratified community consisting of *Ochrobactrum*,  
107 *Bdellovibrio*, *Niabella*, and *Sphingobacterium* (30). The difference in bladder microbiome when  
108 compared to the ILF or intestinum indicates that *H. verbana* microbiomes are body site specific  
109 and suggests a selection process that regulates the composition of these communities.

110

111 Much less is known about the gut microbiome of *M. decora*. Prior studies attempting to  
112 characterize the *M. decora* gut microbiome relied on aerobic culturing methods or sequencing  
113 total ILF DNA with primers specific for *Aeromonas* or Bacteroidetes symbionts. These studies  
114 revealed that the *Aeromonas* species associated with *M. decora* was *A. jandaei* (31) and the  
115 Bacteroidetes species was most similar to uncultured and unidentified species in a clade with

116 *Rikenella*, *Mucinivorans*, and *Alistipes* (8). In this study, we strived for a more complete  
117 understanding of the *M. decora* gut microbiome through culture-independent 16S rRNA V4 deep  
118 sequencing with confirmation by fluorescence *in situ* hybridization (FISH). This procedure was  
119 also performed on *H. verbana* to compare microbial communities between the two host species  
120 using identical techniques.

121  
122 In this work we describe the microbiota of the ILF, bladder, and intestinum in wild and  
123 laboratory-maintained specimens of the North American medicinal leech, *Macrobdella decora*.  
124 Comparison of core and common microbial operational taxonomic units (OTUs) from *M. decora*  
125 to those of the well-described *H. verbana* provides insights about the level of conservation of the  
126 microbiomes between distantly-related and geographically-isolated sanguivorous leeches.

127

## 128 **RESULTS**

### 129 Leech Organs Contain Distinct Microbial Communities

130 The microbial communities of three organs from two leech species (*Hirudo verbana* and  
131 *Macrobdella decora*) were analyzed in this study: the intestinum, crop, and bladder (Table S1).  
132 Due to their small size, for the intestinum and bladder the entire organ was homogenized, while  
133 for the crop only the ILF was collected. Total DNA was extracted from the samples and the V4  
134 region of the 16S rRNA gene was amplified, sequenced using an Illumina MiSeq, and analyzed  
135 to determine the community composition using Qiime 1.9 .1 (32) and R 3.6.0. Of all parameters  
136 tested, the leech host species had the greatest effect on microbiome composition  
137 (PERMANOVA:  $F=316.77$ ,  $R^2=0.53$ ,  $p=0.001$ ) (Figure 1A). This difference diminished when  
138 performing the same analysis at a higher taxonomic level. For example, when the

139 PERMANOVA was performed at the order level (88% sequence identity) the variation  
140 accounted for by host species still had the greatest effect on microbiome composition, but that  
141 effect decreased to only 25% (PERMANOVA:  $F=95.79$ ,  $R^2=0.25$ ,  $p=0.001$ ) (Figure 1B). This  
142 suggests that although the specific genera within the microbial community have changed  
143 between leech hosts, the general physiological functions performed by the microbiome have  
144 likely been conserved. An additional 47% of the variation between samples was not accounted  
145 for by host leech species alone and other factors are important in determining the community  
146 composition.

147  
148 In *H. verbana* samples, the sampled organ had the greatest effect on microbiome composition  
149 (PERMANOVA:  $F=57.56$ ,  $R^2=0.29$ ,  $p=0.001$ ) with feeding in the laboratory accounting for 18%  
150 of variation (PERMANOVA:  $F=3.90$ ,  $R^2=0.18$ ,  $p=0.001$ ), the supplier of *H. verbana* animals  
151 accounting for 5% of variation (PERMANOVA:  $F=19.71$ ,  $R^2=0.05$ ,  $p=0.001$ ), and the shipment  
152 date of *H. verbana* accounting for 7% of variation (PERMANOVA:  $F=6.63$ ,  $R^2=0.07$ ,  $p=0.001$ ).  
153 This confirms previous results that the bladder and digestive tract have very different  
154 microbiomes (14, 30) the microbial composition changes as a result of feeding (15). In addition,  
155 these data suggests that leech suppliers and date of shipment affect the observed ILF microbiome  
156 of *H. verbana*.

157  
158 For this study, we obtained the *H. verbana* from two suppliers: one located in Germany that sold  
159 field-caught animals and one in France that sold farm-bred animals. Treatments before shipping,  
160 including prolonged starvation time to reduce abundance of human pathogens and potentially  
161 feeding animals antibiotic-contaminated blood (33), are additional sources of influence on

162 microbiome variation accounted for but not uniquely discernable within the confounding  
163 influences clustered under the ‘supplier’ variable (18). Laboratory feeding in conjunction with  
164 sampled organ or animal source accounted for an additional 7% of variation (PERMANOVA:  
165  $F=3.82$ ,  $R^2=0.03$ ,  $p=0.001$  and PERMANOVA:  $F=3.94$ ,  $R^2=0.04$ ,  $p=0.001$  respectively). This left  
166 ~35% of variation unaccounted for by these four variables.

167

168 In *M. decora*, the sampled organ had the greatest effect on microbiome composition  
169 (PERMANOVA:  $F=26.47$ ,  $R^2=0.19$ ,  $p=0.001$ ) with the month of animal collection accounting for  
170 17% of variation (PERMANOVA:  $F=9.23$ ,  $R^2=0.17$ ,  $p=0.001$ ), feeding in the laboratory  
171 accounting for 6% of variation (PERMANOVA:  $F=2.85$ ,  $R^2=0.06$ ,  $p=0.001$ ), and animal source  
172 accounting for only 5% of variation (PERMANOVA:  $F=4.37$ ,  $R^2=0.05$ ,  $p=0.001$ ). This mirrors  
173 the results from *H. verbana* in that the bladder and digestive tract have very different  
174 microbiomes, a change in microbial composition occurs as a result of feeding, and animal  
175 collection site and time also affect the observed ILF microbiome of *M. decora*.

176

177 Some variables additionally exhibited statistical significance when evaluated as a group.

178 Sampled organ in conjunction with the month that the animals were collected accounted for an  
179 additional 15% of variation (PERMANOVA:  $F=5.16$ ,  $R^2=0.15$ ,  $p=0.001$ ). The animal collection  
180 month in conjunction with feeding accounted for a final 4% of variation (PERMANOVA:  
181  $F=4.10$ ,  $R^2=0.04$ ,  $p=0.001$ ). This left ~34% of variation unaccounted for by these four variables.

182 Although the microbial differences between organs and after feeding were expected from  
183 previous studies of the *Hirudo* microbiome (14, 15, 19, 20, 30), it was surprising to discover the  
184 large role that collection month played in affecting the *M. decora* microbiome.



185

186 Deep Sequencing of *H. verbana* ILF Microbiome Reveals Rare Community Members

187 16S rRNA V4 deep sequencing of the *H. verbana* ILF identified the same two dominant taxa as  
188 reported previously from 454 pyrosequencing of the 16S rRNA V6 region (21), 16S rRNA V3-V4  
189 deep sequencing (17), and 16S rRNA clone library analysis (14) (Table 1). The ILF microbiota  
190 of *H. verbana* has been described as being dominated by *Mucinivorans* and *Aeromonas* with  
191 occasional Clostridial spp (14, 21). In the 36 animals tested, *Mucinivorans* and *Aeromonas*  
192 together accounted for 30.6 – 99.8% (median = 81.8%) of the sequences from the ILF (Table 1)  
193 with *Proteiniclasticum* making up an additional 0 – 63.4% (median when present = 10.8%,  
194 present in 69% of animals) and *Fusobacterium* making up an additional 0 – 28.3% (median when  
195 present = 11.5%, present in 47% of animals) (Table S2). The *Proteiniclasticum* OTU was  
196 previously reported in the ILF 16S rRNA gene clone libraries of *Hirudo orientalis*, a closely  
197 related leech species (20). The *Fusobacterium* OTU was previously reported in 16S clone  
198 libraries from the intestinum of *H. verbana* (14). The increase in Clostridial sequences observed  
199 in this study compared to previous studies is likely due to the improved DNA extraction  
200 techniques, which included a bead-beating step specifically optimized to increase clostridial cell  
201 lysis and therefore detection (34).

202

203 In addition to the four most abundant taxa, common sequences (found in at least 70% of  
204 samples) in the *H. verbana* ILF included three Bacteroidetes, two *Bacteroides* (0 – 13%, median  
205 when present = 1.6%) and one *Millionella-like* OTU (0 – 2%, median when present = 0.4%); two  
206 *Proteocatella* (0 – 14.9%, median when present = 2.2%); and one *Desulfovibrio* (0 – 8.7%,  
207 median when present = 0.6%) (Table 1 and S2). Finding these additional OTUs in such a high

208 percentage of animals is likely due to the much greater sequencing depth of Illumina technology  
209 as compared to those previously used. The additional *Bacteroides* and *Millionella-like* OTUs  
210 have not been described before in *H. verbana*. However, other researchers have previously noted  
211 that, although dominant, *Mucinivorans* may not be the only Bacteroidales associated with *Hirudo*  
212 leeches (14, 19, 35).

213

214 Sequences belonging to other taxa noted by previous researchers were also found in the 36 *H.*  
215 *verbana* at average concentrations below 1.5% of the total sequences from the ILF community:  
216 Firmicutes: *Erysipelothrix* (max = 5.1%, 17% of animals), *Vagococcus* (max = 1.2%, 17% of  
217 animals), and *Enterococcus* (max = 0.7%, 17% of animals); Alphaproteobacteria: *Ochrobactrum*  
218 (max = 0.4%, 6% of animals); Deltaproteobacteria: *Desulfovibrio-like* (max = 5.9%, 39% of  
219 animals) and *Desulfovibrio* (0.1%, 3% of animals); Gammaproteobacteria: *Proteus* (max =  
220 16.1%, 44% of animals) and *Morganella* (max = 5.2%, 53% of animals); Bacteroidetes:  
221 *Pedobacter* (max = 0.6%, 8% of animals) (14, 20, 21) (Table S2).

222

223 The low concentrations and intermittent presence of many of these previously identified bacteria  
224 highlights the importance of greater sequencing depth and a greater number of specimens tested.  
225 Our analysis of the microbial community in the ILF of *H. verbana* confirms that *Aeromonas* and  
226 *Mucinivorans* comprise the core microbiome with Clostridial species also dominant when  
227 present. Our analysis also reveals a more diverse rare *H. verbana* ILF microbiome than  
228 previously described as well as community members that are present in >70% of the animals.

229

230 *M. decora* ILF Microbiome is Similar to *H. verbana* ILF Microbiome

231 One unique feature of the analysis of *H. verbana* is that these animals were obtained from leech  
232 farms that breed captive animals or maintain field-caught animals for months in captivity before  
233 shipping. Analyzing the microbiome of field-caught *M. decora*, would allow us to assess if the  
234 diversity of the microbiome could be greater in animals captured in the wild. The composition of  
235 the ILF microbiota from the 52 sampled *M. decora* was very similar to that of *H. verbana* in that  
236 it is dominated by *Bacteroides*, *Aeromonas*, and four Clostridiales spp (Table 1 and S2).  
237 *Aeromonas* and *Bacteroides* sequences made up 16 – 73.5% (median = 51%) of the *M. decora*  
238 ILF microbiota while the Clostridiales spp accounted for another 22 – 98%. A *Bacteroides-like*  
239 OTU was present in *H. verbana* ILF at 0 – 2.1% of sequences (63% of animals) and sequences  
240 from only one of these Clostridiales species (*Alkaliphilus-like*) had been reported before from the  
241 *H. verbana* intestine (14) (Table 1 and S2). To our knowledge, the remaining three  
242 Clostridiales species (*Papillibacter-like*, *Clostridium*, and *Butyricicoccus*) have never been  
243 identified from any site in *Hirudo* species.  
244  
245 Sequences from common OTUs (found in at least 70% of samples) in the *M. decora* ILF  
246 included one additional Bacteroidaceae and three Clostridiales (Table S2). These four OTUs  
247 made up an additional 0.6 – 12.8% of the ILF microbial community (median = 4.6%). The  
248 presence of more Clostridiales spp in the ILF microbiota is the primary cause for the observed  
249 increased alpha diversity in *M. decora* over *H. verbana* (Figure 2A). An increase in alpha  
250 diversity between *H. verbana* and *M. decora* ILF microbiota may have been a result of a ‘zoo  
251 effect’ in comparing farmed (*H.verbana*) to newly captured (*M. decora*) animals, an effect that  
252 has been well documented in mammals (36). This hypothesis will be addressed below when  
253 comparing the effect of feeding on the microbiota.

254

255 Microbiome of the Intestinum is Similar to that of the ILF

256 The intestine microbiota from nine *H. verbana* samples was dominated by sequences from four  
257 OTUs: *Insolitispirillum-like* (0.2 – 34.6%, median = 25.4%), *Aeromonas* (2.3 – 24.7%, median =  
258 16.6%), *Mucinivorans* (2 – 51.3%, median = 9.3%), and *Desulfovibrio* (1.7 – 15.3%, median =  
259 4.1%) (Table 1 and S2). *Aeromonas* and *Mucinivorans* were also dominant members of the ILF  
260 community. Sequences from the *Insolitispirillum-like* and *Desulfovibrio* OTUs have been  
261 previously identified in the intestine of *H. verbana* and *H. orientalis* (19, 20). The difference in  
262 microbial community between the *H. verbana* ILF and intestine was marked by changes in the  
263 relative abundance of sequences from both dominant and common OTUs: *Insolitispirillum-like*  
264 (16.9 log<sub>2</sub> fold change,  $p < 0.001$ ), *Rikenella-like* (14.5 log<sub>2</sub> fold change,  $p < 0.001$ ),  
265 *Aquaspirillum-like* (13.8 log<sub>2</sub> fold change,  $p < 0.001$ ), *Mucinivorans* (-2.6 log<sub>2</sub> fold change,  $p <$   
266 0.001) and *Proteocatella* (-11 log<sub>2</sub> fold change,  $p < 0.001$ ). The change in microbial composition  
267 between the ILF and intestine may be directly related to the differences in organ functions  
268 between the two (erythrocyte storage vs meal digestion respectively (1)). The almost doubling of  
269 OTUs that were present in the intestine versus those found in the ILF is consistent with  
270 previous reports (14, 19) of an increase in alpha diversity between the two organs in *Hirudo* spp  
271 (Figure 2B) and confirms that microbial colonization of the ILF is closely regulated.

272

273 In contrast, in *M. decora*, the alpha diversity between ILF and intestine samples did not change  
274 significantly (Figure 2). The dominant OTUs of both ILF and intestine from *M. decora* were  
275 *Aeromonas*, *Bacteroides*, *Butyricoccus*, and *Alkaliphilus-like* (Table 1 and S2). In the  
276 intestine (45 animals sampled), these OTUs accounted for 52.9 – 96.7% of the total sequences

277 while in the ILF, these OTUs accounted for 73.2 – 98.8% of the sequences (Table 1 and S2).  
278 Sequences from common OTUs (found in at least 70% of samples) in the *M. decora* intestine  
279 included additional *Bacteroides*, *Proteocatella*-like, *Desulfovibrio*, and two *Alkaliphilus*-like  
280 OTUs. An explanation for the observation that the microbiome of *M. decora* ILF is not as  
281 reduced as that observed in *H. verbana* may be a result of maintaining or raising the animals in a  
282 farm.

283  
284 The dominant *Alkaliphilus*-like OTU from *M. decora* was previously found in the *H. verbana*  
285 intestine (14) but was detected only in three intestine and three bladder samples from *H.*  
286 *verbana* processed in this study. All of the other OTUs common in the *M. decora* intestine  
287 were not found in *H. verbana* samples. In the intestine, like in the ILF, OTUs defined to the  
288 genus level are not the same but when identified to the order level community composition is  
289 conserved.

290

#### 291 *H. verbana* Bladder Community Contains Three Core OTUs

292 16S rRNA V4 deep sequencing of bladders from ten *H. verbana* animals revealed a more  
293 complex community than had been previously reported through RFLP and 16S rRNA gene  
294 sequencing (30). Kikuchi et al reported the *H. verbana* bladder contains a stratified community  
295 including Alphaproteobacteria (*Ochrobactrum*), Betaproteobacteria (*Comamonas*-like &  
296 *Sterolibacterium*-like), Deltaproteobacteria (*Bdellovibrio*), and Bacteroidetes (*Niabella* &  
297 *Sphingobacterium*) with *Ochrobactrum*, *Comamonas*-like, *Bdellovibrio*, *Niabella*, and  
298 *Sphingobacterium* found in > 90% of animals tested (30). The deep sequencing carried out in the  
299 current study on bladders from ten animals expanded these results by identifying

300 Alphaproteobacteria (*Ochrobactrum*, *Aminobacter*, *Ensifer*, *Insolitispirillum*-like,  
301 *Phreatobacter*-like), Betaproteobacteria (*Ramlibacter*, *Pelomonas*, *Variovorax*, *Acidovorax*,  
302 *Ralstonia*), Deltaproteobacteria (*Bdellovibrio*-like and *Desulfovibrio*), Bacteroidetes (*Niabella*,  
303 *Pedobacter*, and *Flavobacterium*), and *Spirochaetes* (*Spirochaeta*-like) in *H. verbana* bladders  
304 although only *Ochrobactrum*, *Ramlibacter* (previously *Comamonas*-like), *Bdellovibrio*-like, and  
305 *Pedobacter* were recovered frequently enough (in  $\geq 90\%$  of samples) to be considered part of the  
306 core (Table 2).

307  
308 The increase in OTUs identified in the *H. verbana* bladder was likely due to sequencing three  
309 times as many animals as in the previous study as well as sequencing to a much greater depth.  
310 The expanded community contains sequences from an additional four Alphaproteobacteria, three  
311 Betaproteobacteria, one Deltaproteobacteria, and one Spirochaete. Comparing the 16S rRNA V4  
312 sequences to the 16S rRNA sequences produced by Kikuchi et al, indicates that the  
313 *Ochrobactrum*, *Ramlibacter*, *Niabella*, and *Pedobacter* (previously *Sphingobacterium*) OTUs are  
314 the same between the two studies (Table S2). However, the previously-identified  
315 *Sterolibacterium*-like and *Bdellovibrio* OTUs did not have any similar sequences in the new  
316 dataset. The increased number of identified OTUs in conjunction with the small number of  
317 OTUs identified as core suggests that there is large variation in the minor members of the  
318 bladder communities between individual animals. Further research would be required to  
319 determine if this large variation is also apparent between bladders of an individual animal.

320

321 *M. decora* Bladder Community

322 The 16S rRNA V4 sequencing of *M. decora* bladder from 20 animals identified sequences  
323 belonging to *Alphaproteobacteria* (*Ochrobactrum*, *Ensifer*, *Rhizobium*, *Rhizobium-like*,  
324 *Azospirillum*, *Phreatobacter-like*, *Sphingomonas*, *Rhodopseudomonas*), *Betaproteobacteria*  
325 (*Ramlibacter*, *Methylopumilus-like*, *Bacteriovorax-like*, *Pandoraea*, and a *Rhodocyclaeae* sp),  
326 and *Deltaproteobacteria* (*Bdellovibrio*, *Cystobacter-like*, *Desulfovibrio*, and *Bacteriovorax-like*).  
327 Of these identified taxa, only *Ramlibacter*, *Methylopumilus*, *Phreatobacter-like*, and  
328 *Azospirillum* were considered core (Table 2). The *Ramlibacter*, *Ochrobactrum*, and  
329 *Sphingobacterium* OTUs sequenced from *M. decora* are the same as those identified from *H.*  
330 *verbana* bladders (30) (Table S2) and suggest a conservation of bladder symbionts at the genus  
331 level (97% sequence similarity) despite geographic and evolutionary separation.

332  
333 Surprisingly, *Aeromonas*, *Bacteroides*, and Clostridial species were also detected in the bladder  
334 sequences from *M. decora* and *Aeromonas*, *Mucinivorans*, and Clostridial species were identified  
335 in the bladder sequences from *H. verbana*. Two possibilities seem likely to be responsible for  
336 this observation: (i) ILF symbionts are also found in the bladder and nephridia or (ii)  
337 contamination from the ILF occurred during dissection, PCR, or sequencing (37). The  
338 contamination seemed especially likely in animals that had been recently fed as the filled crop is  
339 easily punctured during dissection. In addition, previous data from *H. verbana* bladder  
340 communities suggested that it was unlikely that these two dominant ILF taxa were present in the  
341 bladder (30).

342  
343 In an effort to confirm the 16S V4 rRNA deep sequencing results, FISH was used to detect  
344 specific taxa in the bladder. Unexpectedly, low levels of Aer66-binding cells were detected in

345 cells lining the *M. decora* bladder/nephridia of animals 4 and 7 days after feeding (Figure 3).  
346 While this observation confirms the deep sequencing results, it raises questions to the origin of  
347 these *Aeromonas* cells. A SILVA probeCheck (38) of the Aer66 probe confirms that it should be  
348 specific for *Aeromonadaceae*, interestingly, there is only a single base pair mismatch to the  
349 *Ochrobactrum* sequence. Thus, it remains unclear if this probe is binding to the highly abundant  
350 *Ochrobactrum* or *Aeromonas*. Because the Bacteroidetes probe used in this study also targets  
351 *Pedobacter* and *Flavobacterium* and may cross-react with *Phreatobacter-like*, we cannot  
352 conclusively determine whether the Bacteroidetes symbiont exists within the *M. decora* bladder.

353

#### 354 Physically Stratified Bacterial Community in *M. decora* Bladders

355 FISH imaging of *M. decora* bladders suggests that most Alphaproteobacteria (*Ochrobactrum* and  
356 *Phreatobacter-like*) occur intracellularly in the epithelial cells lining the interior of the bladder,  
357 while Rhizobiaceae (*Aminobacter* and *Ensifer*) occur in the matrix of the bladder contents.  
358 Betaproteobacteria (*Methylopumilus-like* and *Ramlibacter*) occur in close association with the *M.*  
359 *decora* bladder epithelial cells (Figure 3). This layered community is consistent with  
360 localizations reported previously in *H. verbana* bladders (30). Together, this data confirms that  
361 the *M. decora* bladder community composition and distribution are similar to those of *H.*  
362 *verbana* despite differences in specific OTUs and suggests an evolutionary conservation between  
363 these hosts and their symbionts.

364

#### 365 Seasonal Changes Affect the Wild ILF Microbiome

366 The *M. decora* animals used in this study allowed us to evaluate how a wild leech's microbiome  
367 changes during the year. Animals collected during warm months (June-September) had similar



368 ILF and intestinum microbiomes. However, animals collected in October (the beginning of cold  
369 months) contained significantly different ILF microbiomes from those collected in April (end of  
370 cold months) or during warm months ( $p = 0.003$ ) (Figure 4A). Those collected in April showed  
371 the least variation between individuals.

372

373 Among intestinum samples, those from animals collected in April were significantly different  
374 from those collected in October or during warm months ( $p = 0.003$  and  $p = 0.009$  respectively)  
375 (Figure 4B). However, the difference in intestinum microbiome between animals collected in  
376 warm months were not significantly different from those collected in October ( $p = 0.123$ ). The  
377 seasonal difference in the microbiome composition was detected over multiple years with  
378 animals collected during warm months being more similar to those collected in warm months of  
379 other years than to those from animals collected in April or October of the same year.

380

### 381 Feeding Affects the ILF Bacterial Community

382 Sanguivorous leeches are opportunistic ectoparasites that consume several times of their body  
383 weight in a single feeding and rest for months between feeding events (7). Following a feeding  
384 event, the abundance of *Mucinivorans* and *Aeromonas* in the *H. verbana* ILF increases (13, 15)).  
385 Monitoring of bacterial communities after a laboratory-administered, sterile sheep blood meal in  
386 *M. decora* revealed a significant decrease in alpha diversity in ILF by 2 days after feeding (DaF)  
387 that rebounded by 30-90 DaF (Figure 6). At 2 and 4 DaF the communities in the ILF were  
388 significantly different from those at any other time after feeding ( $p = 0.009$  and  $p = 0.003$   
389 respectively). A similar change in community was observed in *H. verbana* where *Mucinivorans*  
390 and *Aeromonas* populations increased after feeding (15). Interestingly, *M. decora* seemed to be

391 divided into two groups, those that recovered quickly (by 4 – 7 DaF) and those that recovered  
392 more slowly (> 7 DaF). These groups can be seen in the dichotomy in the violin plot of Bray-  
393 Curtis distances presented in Figure 6B.

394

395 By 30 DaF, the alpha diversity and common members of the ILF communities of both *H.*  
396 *verbana* and *M. decora* returned to levels indistinguishable from those in unfed animals (Figure  
397 5 and 6). This would suggest that a single blood meal and maintenance in the artificial lab  
398 environment was not sufficient to significantly change the composition of the gut community.  
399 However, it should be noted that animals maintained for longer than 90 days before sampling did  
400 appear to have a reduced variation between individuals (data not shown). This would suggest  
401 that a zoo effect is minimal, although a slight decrease in biodiversity from reduction in the rare  
402 microbiome members should be anticipated, as has been described in mammals (39). The  
403 abundance of sequences from dominant members of the gut microbial community overall  
404 appeared to return to levels comparable to those of unfed animals within 30 DaF (Figure 5).

405

406 The dominant *Bacteroides* and *Aeromonas* symbionts identified by deep sequencing were  
407 additionally observed through FISH imaging. Immediately after capture, the microbial  
408 population in the *M. decora* crop was below the limit of detection for FISH, although rare  
409 *Aeromonas* cells were occasionally found (Figure 7). After feeding a blood meal the microbial  
410 population increased at 4 and 7 DaF (Figure 7) with Bacteroidetes forming large microcolonies  
411 by 4 DaF and *Aeromonas* pelagically spread throughout the crop by 7 DaF. A similar pattern  
412 was previously observed and quantified in *H. verbana* (15). Interestingly, some *Aeromonas* at 7  
413 DaF were found associated with eukaryotic cells within the crop. These cells are likely

414 circulating immune cells from the leech host. Phagocytosis of *Aeromonas* by leech hemocytes  
415 was previously observed in *H. verbana* when the *Aeromonas* strain lacked a functioning T3SS  
416 but not for the wild type (40).

417

#### 418 Feeding Does not Affect the Intestinum Bacterial Community

419 Unlike the bacterial community present in the ILF, the intestinum bacterial community appears  
420 to be much more stable. No significant change between any of the days after feeding were  
421 observed ( $p \geq 0.15$ ). This suggests that growth of any single member of the community is  
422 matched by other members. More likely, the intestinum may be a more constant environment  
423 with a regular inflow and outflow that is not as much affected by sporadic feeding events. It is  
424 also possible that the intestinum serves as a reservoir from which new blood meals may be  
425 seeded with symbionts after ingestion.

426

#### 427 Geographic Location

428 Because *M. decora* were collected from multiple ponds in nature, we were able to compare the  
429 microbial communities of animals from the same species but distant geographic locations. There  
430 was no significant difference between microbial communities in the ILF of *M. decora* from CT,  
431 MA, NY, and VT ( $p \geq 0.222$ ) (Figure s1). Statistical analyses on geographic effects were  
432 performed only on samples from MA and CT due to the lower sample number for samples from  
433 NY and VT.

434

435 The microbiome from the intestinum of MA animals was significantly different from that of CT  
436 animals ( $p = 0.006$ ), but interestingly the ILF microbiome was indistinguishable between the two

437 leech populations (Figure s1). The difference in microbial communities between the ILF and  
438 intestinum was significant in animals from MA ( $p = 0.006$ ), but not in animals from CT ( $p =$   
439  $0.084$ ), and was associated with a decrease in *Alkaliphilus-like* ( $p = 0.022$ ) and increase in  
440 *Papillibacter-like* ( $p = 0.001$ ) OTUs. In the ILF, these OTUs make up  $\sim 8.2\%$  of the total ILF  
441 sequences while in the intestinum they make up less than  $1.6\%$ . This difference between ILF and  
442 intestinum microbiota is almost imperceptible in animals from CT. The slight differences in  
443 Clostridiales species between MA and CT animals suggests a site-specific variation in less  
444 abundant community members within *M. decora*, however the site-specific dominant symbionts  
445 and core community remained the same and indicate a conservation of symbionts despite  
446 geographic separation.

447

448

449

450

451

452

453

454

## 455 DISCUSSION

456 In this study we have used deep sequencing of the V4 region of the 16S rRNA gene and FISH to  
457 characterize the microbiome from three organs in the North American medicinal leech,  
458 *Macrobodella decora*. At the taxonomic level of order, the microbiomes described from wild-  
459 caught *M. decora* appeared very similar to those from *Hirudo verbana*. However, at the genus

460 level, the microbiomes were easily differentiated between the two host leech species. This is  
461 similar to findings in other animal models where often the host-specific genera show an  
462 evolutionary pattern that mimics that of the host's evolution (41-45).

463  
464 In both leech species, the gut microbial communities are dominated by *Aeromonas*,  
465 Bacteroidales, and Clostridiales species. This is consistent with previous findings that  
466 Bacteroidetes and *Aeromonas* are common but not obligate in the gut of animals and insects fed  
467 on blood (46-51). Siddall et al. have shown that many sanguivorous leeches maintain a gut  
468 symbiosis with *Aeromonas* and Bacteroidetes species (8). Because of the difficulty of  
469 distinguishing *Aeromonas* species based solely on 16S sequencing data (52, 53), we are unable to  
470 determine whether the *Aeromonas* species from *M. decora* is the same as that from *H. verbana*.

471  
472 In-depth genetic analyses of an *Aeromonas veronii* strain isolated from *H. verbana* has shown  
473 that the ability to grow in blood is not sufficient for leech gut colonization, but rather that a  
474 number of colonization factors such as secretion systems (54), carbon starvation response (55),  
475 oxidative stress response inhibition (7), and heme acquisition processes (56) are critical in  
476 enhancing leech gut colonization. New studies comparing genomic variation between  
477 *Aeromonas* strains isolated from sanguivorous leech species to those of non host-associated  
478 environmental strains may be used to further identify genes critical for host colonization and  
479 persistence.

480  
481 In addition to confirming a similar core and common microbiome between the two leech hosts,  
482 our study also identified a rich rare microbiome. Previous research in a variety of environments

483 has concluded that although a relatively small number of OTUs may dominate samples, low-  
484 abundance populations may be responsible for driving changes in observed phylogenetic  
485 diversity (57, 58). Rare species may have a significant role in metabolic cycles and may be a  
486 hidden driver of ecosystem functioning (59). Because dominant and core microbes are easier to  
487 identify and predict, rare microbes may be overlooked keystone species responsible for  
488 regulating the community's development and function (59). In our study, the ability to examine  
489 an increased number of animals, to examine three body sites from each animal, and to sequence  
490 to a much greater depth resulted in the detection of an increased level of inter-animal variations  
491 in the less abundant microbiota and suggest a greater diversity in the rare microbiome than  
492 previously predicted.

493  
494 We were also able to observe the effect of geographic isolation on the less abundant members of  
495 the gut microbial community in *M. decora*. The very slight but statistically significant  
496 differences in community composition between animals from MA and CT indicated that the  
497 relationship with dominant symbionts is consistently conserved despite geographic separation of  
498 ~100 km. It is possible that this is due to a small sample size as we compared 13 unfed *M.*  
499 *decora* from MA and seven from CT and previous studies of synthetic and natural microbial  
500 communities found that insufficient sampling could yield an artificial difference between  
501 geographically separated communities (60, 61). As has been noted previously in the termite gut  
502 (58), the difference in community composition is based on minor members of the community  
503 and is reminiscent of a similar pattern observed in community differences between suppliers of  
504 *H. verbana* (data not shown). We therefore hypothesize that the conserved members of the

505 community have been evolutionarily maintained in hirudinid leeches despite species-  
506 diversification and continent-dividing events.

507

508 Not only was the core gut microbiome similar between *M. decora* and *H. verbana*, but also the  
509 dynamic response of these symbionts in response to feeding a blood meal. FISH imaging  
510 confirmed similar colonization patterns of the ILF of *Aeromonas* and Bacteroidetes from *H.*  
511 *verbana* and *M. decora*. Although part of the decrease in alpha diversity in the leech ILF  
512 microbiome post blood meal consumption may be due to innate immune properties of the blood  
513 meal (62), in a number of vertebrate species it has also been shown that extreme feeding or  
514 fasting events do result in decreased alpha diversity (63, 64). In *H. verbana*, it has been  
515 suggested that the *Aeromonas* symbiont may provide additional antimicrobial peptides  
516 responsible for restricting bacterial colonization in addition to host-produced antimicrobial  
517 peptides (65). Because the core community and post-feeding community dynamics are similar in  
518 *M. decora*, it is reasonable to assume that a similar process may also occur in this host species.

519

520 While our laboratory-maintained animals were tracked for 30-90 days after feeding, in the wild  
521 leeches are thought to go for even longer periods of time between feedings as the animals are  
522 inactive during the cold months. This extended period between feedings likely resulted in a  
523 starved phenotype in animals collected in April. Our results are consistent with the long  
524 starvation period occurring during the cool months affecting the gut microbial community of *M.*  
525 *decora* and the relative nimity of the warm months where feedings may occur regularly. The  
526 observed seasonal effect may also be driven by the sequencing of transient environmental

527 microbes from within the leech crop, as has been observed in a recent limited survey of wild *H.*  
528 *verbana* (17).

529

530 Changes in gut microbial populations as a result of irregular feeding events has been observed in  
531 other animals too. Other researchers have observed Clostridial populations increase rapidly in  
532 response to feeding while Bacteroidales numbers increase at a slower rate and high levels of  
533 Bacteroidales or Rikenellaceae are indicative of long periods between feedings in avian,  
534 reptilian, and mammalian hosts (63, 64, 66). In our experiments, a higher numbers of  
535 Bacteroidales sequences were found in the ILF of *M. decora* collected in April when compared  
536 to those collected in June-October. The proportion of Bacteroidales sequences additionally  
537 decreased in leeches immediately after feeding (when the number of Clostridiales sequences  
538 increased). FISH imaging did indicate that Bacteroidales increase in number four days after  
539 feeding, suggesting that the change in sequence ratio is due to a combination of rapid replication  
540 of Clostridiales and a much slower replication of Bacteroidales. This consistency with  
541 community dynamics observed in other animal models then suggests that leeches may be good  
542 models to predict microbial changes due to intermittent feedings or extended periods of  
543 starvation.

544

545 In addition to the conservation of *Aeromonas*, Bacteroidetes, and Clostridial gut symbionts, the  
546 bladder taxa *Comamonadaceae*, *Ochrobactrum*, and *Nubsella* appear to have also been  
547 evolutionarily maintained within Hirudiniform leech bladders. They are common in annelid  
548 bladders as are *Bordetella*, *Methylophilus*, *Achromobacter*, *Variovorax*, *Azospirillum*,  
549 *Mesorhizobium*, *Phyllobacterium*, *Rhizobium*, *Desulfovibrio*, *Pedobacter*, *Spirochaeta* (28). The



550 taxa from the bladders of both *H. verbana* and *M. decora* were very similar to those found in  
551 other annelids, which include Alphaproteobacteria (*Ochrobactrum*, *Azospirillum*, Brucellaceae,  
552 Rhizobiaceae, Rhodospirillaceae, & Bradyrhizobiaceae), Betaproteobacteria (Comamonadaceae,  
553 Methylophilaceae, & Rhodocyclaceae) and Bacteroidetes (*Pedobacter*) (28, 29). This  
554 observation suggests an even greater conservation than that observed in digestive symbionts as  
555 the conservation has occurred at the genus level in medicinal leeches and at the family level over  
556 multiple evolutionary events in the annelids.

557  
558 The *Ramlibacter* (previously *Comamonas*-like), *Ochrobactrum*, and *Pedobacter* (previously  
559 Sphingobacterium) OTUs sequenced from *M. decora* are the same as those identified from *H.*  
560 *verbana* bladders (30). However, the *Pedobacter* sequenced in this study does not seem to be the  
561 same that Ott isolated from the mucus castings of adult *H. verbana* (67). This may indicate a  
562 difference between the bacteria on the outside of the leech and those adapted to colonize the  
563 bladder of the leech, as has been observed in the specialization of *Aeromonas* strains inside the  
564 leech gut (27, 54-56, 68). Further research is required to determine how these two leech species  
565 are able to maintain such specific bladder symbioses and by what means the symbionts are  
566 efficiently transmitted between animals.

567  
568 Based on the deep-sequencing absence of *Niabella*, *Pedobacter*, *Ramlibacter*, *Ensifer*,  
569 *Phreatobacter*, and *Aminobacter* sequences in ILF and intestinum samples, the low abundance of  
570 *Ochrobactrum* sequences in ILF samples (max = 0.4%), and the absence of any ALF968-,  
571 Rhiz1244-, or Bet42a-binding cells in FISH images (data not shown) we hypothesize that these  
572 genera are specific to the bladder. Presence of these OTUs in an ILF sample might be due to

573 contamination during dissection or a diseased state of the animal. This has occurred in previous  
574 studies where bladder-specific symbionts were found in the ILF and intestinum of 3 wild *H.*  
575 *verbana* (17) and *Pedobacter* and *Ochrobactrum* were cultured from intestinum samples (14,  
576 69). The fact that, in the Worthen study, *Pedobacter* and *Ochrobactrum* clones were only  
577 recovered from recently-fed animals supports the possibility of sample contamination during  
578 dissection (recently fed animals have larger bladders). Because of the friability of leech tissue  
579 and the examples of bladder symbionts appearing in ILF and intestinum samples, careful  
580 dissection technique is critical to reduce contamination during sample acquisition.

581  
582 Our research has identified a conservation of gut and bladder symbioses in medicinal leech  
583 species from Europe and North America. While the community structure of *H. verbana* and *M.*  
584 *decora* microbiomes have specific similarities, the differences that exist between the two can be  
585 exploited in the future to gain a better understanding of host/symbiont co-evolution. Not only are  
586 the gut symbionts conserved, but their dynamics in response to a blood feeding are similar as  
587 well. From our data we can hypothesize that the gut microbiome composition is affected by  
588 periods of starvation and torpidity. In *H.verbana*, the simple gut community helps to digest the  
589 blood meal (7) and protect the host from invading bacteria (65). It is likely that the microbial  
590 communities in the gut of *M. decora* perform very similar functions. Future work should focus  
591 on isolating dominant members of both symbioses to compare conserved metabolic and  
592 colonization abilities and to test for host species specialization. Through understanding  
593 molecular and mechanistic studies enabled by simple systems, especially in evolutionarily  
594 conserved biological processes and metabolic capabilities, one can form predictions that are  
595 more challenging to test in more complex communities.

596 METHODS

597

598 Animals

599 *M. decora* were collected from ponds located in Storrs, CT (41°49'3.074"N, 72°15'32.704"W),

600 Groton, MA (42°35'26.993"N, 71°32'25.63"W), Caroga, NY (43°11'28.684"N,

601 74°28'10.026"W), and Mount Snow, VT (42°58'25.3"N, 72°55'47.9"W). If sacrificed within 1

602 week of collection, animals were maintained in native pond water.

603 *H. verbana* were purchased from Leeches U.S.A. (Westbury, NY U.S.A.) and BBEZ (Biebertal,

604 Germany) and maintained as described below.

605

606 Husbandry

607 Leeches were maintained in circular tanks (up to 10 animals/tank) in an environmental chamber

608 with 12/12h day/night cycles at 25/23°C respectively. Sterile dilute instant ocean (DIO)

609 consisting of 34 mg/L instant ocean salts (Aquarium Systems, Inc Mentor, OH U.S.A.) in

610 nanopure water was changed weekly or when the animals vomited or an animal in the tank died.

611 Tanks contained a minimum of one autoclaved rock.

612

613 Tanks were cleaned by completely emptying the old water and performing multiple complete,

614 small volume, water changes until water remained clear for at least 20 min after the last change.

615 Tanks were then filled to previous level and returned to environmental chamber.

616

617 Feeding

618 Animals were fed as described previously (4). Sheep blood with heparin anticoagulant was  
619 purchased from Lampire Biological Laboratories (Pipersville, PA U.S.A.). Animals were fed in  
620 groups of 1-3 animals on sterile 50 mL Falcon tubes containing 30 mL sheep blood, warmed to  
621 37°C, and covered with Parafilm (American National Can, Greenwich, CT U.S.A.). All animals  
622 were allowed to feed to satiety and then let sit in sterile DIO for ~30 min before handling after  
623 feeding.

624

#### 625 Dissection

626 Animals were removed from the tank and the anterior end was tied with string to inhibit  
627 regurgitation before narcotizing in 70% ethanol (13). Animal was then treated with RNase away  
628 and rinsed with molecular biology grade water. An additional string was tied around to bisect  
629 the animal into anterior and posterior fractions.

630 Bladder: A small primary incision was made immediately lateral to the dorsal lateral dextral  
631 stripe and immediately posterior to the second string. Bladders were identified and carefully  
632 dissected so as to minimize contamination from ILF. Bladders were briefly rinsed in sterile  
633 phosphate buffered saline, PBS, then placed in sterile bead-beating tube. Each sample consisted  
634 of 1-3 bladders from the same leech. In this manuscript, the term ‘bladders’ includes bladders  
635 and the attached nephridia.

636 ILF: To access the crop contents, a secondary central incision was made immediately below the  
637 second string. Approximately 100  $\mu$ L ILF was collected as it was released and placed in a sterile  
638 bead-beating tube. In animals with especially low volumes of ILF, a sterile pipette tip was used  
639 to gently scrape the inside of the crop.

640 Intestinum: To access the intestine, a second incision was made immediately lateral to the  
641 anus. The intestine was carefully dissected from the anus and consisted of  $\geq 1$  cm intestine  
642 with contents. Samples were placed in bead-beating tubes or 1.5 mL microcentrifuge tubes and  
643 snap frozen in liquid nitrogen before storage at  $-80^{\circ}\text{C}$ .

644

#### 645 Tissue Fixation and Embedding

646 After bladder, ILF, and intestine sample were collected a fully bisecting incision was made  
647 immediately posterior to the second string. The anterior portion of the animal was placed in  
648 methacarn (6:3:1 methanol:chloroform:acetic acid) (70). Tissues in methacarn were stored at  $4^{\circ}\text{C}$   
649 with rocking. Regular fixative changes were made when the fixative was no longer clear. Tissues  
650 were dissected and a final fixative change was performed with fresh anhydrous methacarn before  
651 incubating for one additional week,  $4^{\circ}\text{C}$  with rocking. The anhydrous methacarn was replaced  
652 with anhydrous methanol and the tissues stored at  $4^{\circ}\text{C}$  until embedding. Tissues were cleared  
653 with a decreasing methanol:xylene series then embedded in Paraplast Plus® (Millipore Sigma,  
654 St. Louis, MO U.S.A.).

655

#### 656 Fluorescence *In-Situ* Hybridization (FISH)

657 Paraffin-embedded tissues were sectioned at 6-8  $\mu\text{m}$  using a microtome and placed on poly-L-  
658 lysine-coated slides. Sections on slides were cleared with xylene then rehydrated with an  
659 ethanol:water series. Slides were bleached for 8-12 h using 2% hydrogen peroxide and a standard  
660 fluorescent light bulb (with concomitant cooling over an ice bath). 0.54M NaCl, 12mM Tris-Cl,  
661 30% formamide, and 1.2% sodium dodecyl sulfate with 1 $\mu\text{M}$  Cy3 probe, 1 $\mu\text{M}$  Cy5 probe, and  
662 3 $\mu\text{M}$  Eub338. Slides were observed using a Nikon A1R microscope (laser wavelengths 405nm

663 (DAPI), 488nm (Alexa488), 558nm (Cy3), 640nm (Cy5)) and images processed using ImageJ  
664 1.51s (71).  
665  
666 **Bead-beating DNA Extraction**  
667 Modified version of previous protocol published by Yu et al (72). 300  $\mu$ L cell lysis buffer was  
668 added to sample in bead tube containing 0.1mm and 0.5mm zirconia/silica beads (BioSpec  
669 Products, OK, U.S.A.) beads. Samples were beaten for 90 sec and briefly centrifuged before  
670 transferring supernatant to clean 1.5 mL microcentrifuge tube. An additional 150  $\mu$ L lysis buffer  
671 was added to the bead tube and sample was beaten again 90 sec. The supernatant previously  
672 removed was returned to bead tube and incubated for 15min at 56°C with 5 sec vortexing every 4  
673 min. The sample was briefly centrifuged before adding 100  $\mu$ L 10 M ammonium acetate at 4°C  
674 and vortexed 15 sec before incubating for 10 min on ice. The sample was centrifuged for 10min  
675 at 16 000 x g. The supernatant was transferred to clean 1.5mL MCF tube and to which 350  $\mu$ L  
676 ethanol at 4°C was added before vortexing for 10 sec and transferring the supernatant to a  
677 QIAamp Mini spin column (Qiagen Germantown, MD U.S.A.). The sample was process as  
678 recommended in the QIAamp DNA Mini Handbook and eluted with 10 mM Tris-Cl, pH 8.5. The  
679 eluted DNA concentration was measured using Qubit™ dsDNA HS Assay Kit (Thermo Fisher  
680 Scientific Carlsbad, CA U.S.A.). Stored at -20°C.

681  
682 **MasterPure DNA Extraction**  
683 MasterPure complete DNA extraction without column purification into 50 $\mu$ L TE was performed  
684 according to manufacturer's protocol (Epicentre Madison, WI U.S.A.). No significant difference  
685 was found between the two extraction methods (PERMANOVA:  $p \geq 0.23$ ).

686

## 687 Sequencing and Initial OTU Picking

688 Extracted DNA samples were analyzed by amplifying the V4 hypervariable region of the 16S  
689 ribosomal RNA (rRNA) gene using primers designed in (73). PCR reactions were prepared as in  
690 (58) and sequenced using an Illumina MiSeq (Illumina San Diego, CA U.S.A.) with custom  
691 sequencing primers added to the reagent cartridge (73) and sequenced  $2 \times 250\text{bp}$ . The sequence  
692 data was deposited in the NCBI SRA under project ID PRJNA544194.

693

694 Resulting community sequences were processed using MacQiime as outlined in (58) using a  
695 GreenGenes reference library (2013-08 release). Sequences not clustered were identified using  
696 the Ribosomal Database Project (74) to the lowest possible taxonomic level.

697

## 698 Bacterial Community Analysis

699 Resulting sequencing data was analyzed using MacQiime and R as described below. Complete  
700 coding is available in supplemental materials and via GitHub:

701 [https://github.com/joerggraf/McClureE\\_Md2019/](https://github.com/joerggraf/McClureE_Md2019/). (32, 75)

702

703 Sample Selection: Samples with 1) fewer than 10,000 reads or 2) fewer than 3 OTUs were  
704 excluded from analysis.

705

706 Positive Controls: Two types of positive control were prepared and sequenced. 1) Amplification  
707 of a dilution series of a ZymoBIOMICS Microbial Community DNA Standard (Zymo Research,  
708 Irvine, CA U.S.A.), 2) Some samples were amplified multiple times with different PCR primers

709 and on different runs to confirm the reproducibility of the data (data not shown). For samples  
710 amplified and sequenced multiple times, the sample with the most reads was used for analysis.

711  
712 Negative Controls: Two types of negative controls were prepared and sequenced. 1) Reagent  
713 controls were prepared by performing the DNA extraction procedure using the same reagents  
714 without any sample. The resulting DNA yields for these reagent controls after extraction were  
715 always below the limit of detection for the Qubit dsDNA High-Sensitivity Assay. 2) Negative-  
716 PCR controls were prepared by performing V4-specific PCR amplification on molecular biology  
717 grade water. The resulting reactions produced no bands when analyzed with the QIAxcel DNA  
718 Fast Analysis cartridge (Qiagen Germantown, MD U.S.A.).

719  
720 After sequencing, each negative control contained less than 2,000 reads. Negative controls were  
721 combined and compared to identify contaminating OTUs using maxNeg and meanNeg. maxNeg  
722 was defined as the maximum count of a single OTU found in a negative control and was  
723 determined to be 379 reads. meanNeg was defined as the mean count of all OTUs when found in  
724 negative controls and was determined to be 4 reads. OTUs were first restricted by requiring that  
725 each OTU be present in at least 1 sample with a read count  $\geq$  maxNeg. This resulted in a  
726 dataset consisting of 158 OTUs.

727  
728 Contaminating OTUs were further identified through the use of the decontam package (76).  
729 After removal of contaminants identified by decontam OTUs, the dataset consisted of 157 OTUs,  
730 indicating that most contaminant OTUs were found at counts  $\leq$  maxNeg and so were not  
731 considered as community members.



732

733 After initial trimming, all samples contained a minimum of 10,000 reads (maximum = 375,834,  
734 minimum=10,287, median=62,015).

735

736 Effect of Extraction Method: A PERMANOVA analysis using the Bray-Curtis metric was  
737 performed through the adonis function of the vegan package (77) to determine the effect of  
738 extraction method. No significant difference was found between the two extraction methods  
739 (PERMANOVA:  $p \geq 0.23$ ).

740

741 Effect of Leech Species: A PERMANOVA analysis using the Bray-Curtis metric was performed  
742 through the adonis function of the vegan package (77) to determine the effect of leech species.  
743 This analysis was performed twice 1) with taxa split into original OTUs as determined by Qiime  
744 and 2) with taxa agglomerated at the order level (using tax\_glom function of the phyloseq (75)  
745 package).

746 Non-metric Multidimensional Scaling (NMDS) plots were prepared using the distance, ordinate,  
747 and plot\_ordination function of the phyloseq package (75). Distances were calculated with the  
748 Unifrac method (78).

749 Variation within *H. verbana* and *M. decora* was evaluated separately with a PERMANOVA  
750 analysis using the Bray-Curtis metric through the adonis function of the vegan package (77).

751 Sample groups were probed for the effect of sampled organ, feeding, animal supplier/source, and  
752 shipment/collection date.

753

754 Core and Common OTUs: The average read count of a single OTU in any negative control was  
755 calculated to be 4 (meanNeg). This number was then used to calculate a conservative estimate  
756 for the minimum fraction of a sample that an OTU must compose to be considered present in that  
757 sample. It was assumed that any true OTU would contain a read count greater than or equal to  
758 meanNeg, so in the smallest sample with 10,287 total reads, an OTU must contain at least 4  
759 reads or .03% of the total community in order to be considered present. The Core community  
760 was defined to consist of only those OTUs present in at least 90% of samples in a group. The  
761 Common community was defined to consist of only those OTUs present in at least 70% of  
762 samples in a group.

763

764 Alpha Diversity: Alpha diversity was calculated using the Shannon metric in the plot\_richness  
765 function of the phyloseq package (75). Alpha diversity was calculated for ILF and intestinum  
766 samples separately.

767

768 Effect of *M. decora* Collection Month: A PERMANOVA analysis using the Bray-Curtis metric  
769 was performed through the adonis function of the vegan package (77) to determine the effect of  
770 collection month/season on *M. decora* samples. This analysis was performed twice 1) with ILF  
771 samples and 2) with intestinum samples.

772 NMDS plots were prepared using the distance, ordinate, and plot\_ordination function of the  
773 phyloseq package (75). Distances were calculated with the Unifrac method (78).

774

775 Plotting gut community over time: For each time point after feeding, taxa were assessed for  
776 presence ( $\geq 0.1\%$  of total reads) or absence. At any time point, if the taxon was determined to be

777 present in  $\leq 1$  samples, it was considered absent from that time point. Ggplot2 was used to  
778 produce a stat\_boxplot with whiskers at 1.5x interquartile range.

779

## 780 ACKNOWLEDGEMENTS

781 This research was supported by NIH R01 GM095390 to J. Graf, P. Visscher, and H. Morrison,  
782 NSF 1710511 to J. Graf and V. Cooper and the University of Connecticut. We would like to  
783 thank R. Rubinstein for help with Python code used to prepare tables and the Microbial  
784 Resources and Services Facility of the University of Connecticut for sequencing the samples. J.  
785 Graf is a leech microbiology consultant for the German leech farm Biebertaler Blutegelzucht  
786 GmbH, Biebertal, Germany, and the company does not direct or approve J. Graf's research and  
787 publications.

788

## 789 REFERENCES

- 790 1. Sawyer RT. 1986. Leech biology and behavior. Clarendon Press, Oxford.
- 791 2. Brinkmann A, Jr. 1947. Two new antarctic leeches. Nature 160:756.
- 792 3. Whitaker IS, Rao J, Izadi D, Butler PE. 2004. Historical Article: *Hirudo medicinalis*:  
793 ancient origins of, and trends in the use of medicinal leeches throughout history. Br J  
794 Oral Maxillofac Surg 42:133-7.
- 795 4. Graf J. 2000. The symbiosis of *Aeromonas* and *Hirudo medicinalis*, the medicinal leech.  
796 ASM News 66:147-153.
- 797 5. Siddall ME, Trontelj P, Utevsky SY, Nkamany M, Macdonald KS. 2007. Diverse  
798 molecular data demonstrate that commercially available medicinal leeches are not *Hirudo*  
799 *medicinalis*. Proc Biol Sci 274:1481-1487.

- 800 6. Utevsky SY, Trontelj P. 2005. A new species of the medicinal leech (Oligochaeta,  
801 Hirudinida, Hirudo) from Transcaucasia and an identification key for the genus Hirudo.  
802 Parasitol Res 98:61-6.
- 803 7. Marden JN, McClure EA, Beka L, Graf J. 2016. Host Matters: Medicinal Leech  
804 Digestive-Tract Symbionts and Their Pathogenic Potential. Front Microbiol 7:1569.
- 805 8. Siddall ME, Min GS, Fontanella FM, Phillips AJ, Watson SC. 2011. Bacterial symbiont  
806 and salivary peptide evolution in the context of leech phylogeny. Parasitology 138:1815-  
807 27.
- 808 9. Rio RVM, Attardo GM, Weiss BL. 2016. Grandeur Alliances: Symbiont Metabolic  
809 Integration and Obligate Arthropod Hematophagy. Trends in Parasitology 32:739-749.
- 810 10. Min GS, Sarkar IN, Siddall ME. 2010. Salivary transcriptome of the North American  
811 medicinal leech, *Macrobdella decora*. J Parasitol 96:1211-21.
- 812 11. Whitaker IS, Oboumarzouk O, Rozen WM, Naderi N, Balasubramanian SP, Azzopardi  
813 EA, Kon M. 2012. The efficacy of medicinal leeches in plastic and reconstructive  
814 surgery: a systematic review of 277 reported clinical cases. Microsurgery 32:240-50.
- 815 12. Wenning A, Zerbst-Boroffka I, Bazin B. 1980. Water and salt excretion in the leech. J  
816 Comp Physiol B 139:97-102.
- 817 13. Graf J. 1999. Symbiosis of *Aeromonas veronii* biovar sobria and *Hirudo medicinalis*, the  
818 medicinal leech: a novel model for digestive tract associations. Infect Immun 67:1-7.
- 819 14. Worthen PL, Gode CJ, Graf J. 2006. Culture-independent characterization of the  
820 digestive-tract microbiota of the medicinal leech reveals a tripartite symbiosis. Appl  
821 Environ Microbiol 72:4775-4781.

- 822 15. Kikuchi Y, Graf J. 2007. Spatial and temporal population dynamics of a naturally  
823 occurring two-species microbial community inside the digestive tract of the medicinal  
824 leech. *Appl Environ Microbiol* 73:1984-1991.
- 825 16. Nelson M, Bomar L, Maltz M, Graf J. 2015. *Mucinivorans hirudinis* gen. nov., sp. nov.,  
826 an anaerobic, mucin-degrading bacterium isolated from the digestive tract of the  
827 medicinal leech, *Hirudo verbana*. *Int J Syst Evol Microbiol* 65:990-5.
- 828 17. Neupane S, Modry D, Pafčo B, Zurek L. 2019. Bacterial Community of the Digestive  
829 Tract of the European Medicinal Leech (*Hirudo verbana*) from the Danube River.  
830 *Microb Ecol* doi:10.1007/s00248-019-01349-z.
- 831 18. Beka L, Fullmer MS, Colston SM, Nelson MC, Talagrand-Reboul E, Walker P, Ford B,  
832 Whitaker IS, Lamy B, Gogarten JP, Graf J. 2018. Low-Level Antimicrobials in the  
833 Medicinal Leech Select for Resistant Pathogens That Spread to Patients. *mBio* 9.
- 834 19. Laufer AS, Siddall ME, Graf J. 2008. Characterization of the digestive-tract microbiota  
835 of *Hirudo orientalis*, a european medicinal leech. *Appl Environ Microbiol* 74:6151-4.
- 836 20. Whitaker IS, Maltz M, Siddall ME, Graf J. 2014. Characterization of the digestive tract  
837 microbiota of *Hirudo orientalis* (medicinal leech) and antibiotic resistance profile. *Plast*  
838 *Reconstr Surg* 133:408e-418e.
- 839 21. Maltz MA, Bomar L, Lapierre P, Morrison HG, McClure EA, Sogin ML, Graf J. 2014.  
840 Metagenomic analysis of the medicinal leech gut microbiota. *Front Microbiol* 5:151.
- 841 22. Nogge G. 1981. Significance of symbionts for the maintenance of an optimal nutritional  
842 state for successful reproduction in hematophagous arthropods. *Parasitology* 82:101-104.
- 843 23. Manzano-Marin A, Ocegüera-Figueroa A, Latorre A, Jimenez-Garcia LF, Moya A. 2015.  
844 Solving a bloody mess: B-vitamin independent metabolic convergence among

- 845           gammaproteobacterial obligate endosymbionts from blood-feeding arthropods and the  
846           leech *Haementeria officinalis*. *Genome Biol Evol* 7:2871-84.
- 847   24.   Rio RVM, Anderegg M, Graf J. 2007. Characterization of a catalase gene from  
848           *Aeromonas veronii*, the digestive-tract symbiont of the medicinal leech. *Microbiol*  
849           153:1897-1906.
- 850   25.   Husnik F. 2018. Host–symbiont–pathogen interactions in blood-feeding parasites:  
851           nutrition, immune cross-talk and gene exchange. *Parasitology* 145:1294-1303.
- 852   26.   Silver AC, Graf J. 2011. Innate and procured immunity inside the digestive tract of the  
853           medicinal leech. *Inv Survival Journal* 8:173-178.
- 854   27.   Maltz M, Graf J. 2011. The type II secretion system is essential for erythrocyte lysis and  
855           gut colonization by the leech digestive tract symbiont *Aeromonas veronii*. *Appl Environ*  
856           *Microbiol* 77:597-603.
- 857   28.   Davidson SK, Powell R, James S. 2013. A global survey of the bacteria within  
858           earthworm nephridia. *Mol Phylogenet Evol* 67:188-200.
- 859   29.   Viana F, Paz LC, Methling K, Damgaard CF, Lalk M, Schramm A, Lund MB. 2018.  
860           Distinct effects of the nephridial symbionts *Verminephrobacter* and *Candidatus*  
861           *Nephrothrix* on reproduction and maturation of its earthworm host *Eisenia andrei*. *FEMS*  
862           *Microbiol Ecol* 94.
- 863   30.   Kikuchi Y, Bomar L, Graf J. 2009. Stratified bacterial community in the bladder of the  
864           medicinal leech, *Hirudo verbana*. *Environ Microbiol* 11:2758-70.
- 865   31.   Siddall ME, Worthen PL, Johnson M, Graf J. 2007. Novel role for *Aeromonas jandaei* as  
866           a digestive tract symbiont of the North American medicinal leech. *Appl Environ*  
867           *Microbiol* 73:655-8.

- 868 32. Caporaso JG, Kuczynski J, Stombaugh J, Bittinger K, Bushman FD, Costello EK, Fierer  
869 N, Peña AG, Goodrich JK, Gordon JI, Huttley GA, Kelley ST, Knights D, Koenig JE,  
870 Ley RE, Lozupone CA, McDonald D, Muegge BD, Pirrung M, Reeder J, Sevinsky JR,  
871 Turnbaugh PJ, Walters WA, Widmann J, Yatsunenko T, Zaneveld J, Knight R. 2010.  
872 QIIME allows analysis of high-throughput community sequencing data. *Nat Methods*  
873 7:335-336.
- 874 33. Sartor C, Bornet C, Guinard D, Fournier PE. 2013. Transmission of *Aeromonas*  
875 *hydrophila* by leeches. *Lancet* 381:1686.
- 876 34. Ge H, Jensen PD, Batstone DJ. 2011. Temperature phased anaerobic digestion increases  
877 apparent hydrolysis rate for waste activated sludge. *Water Res* 45:1597-1606.
- 878 35. Ott BM, Rickards A, Gehrke L, Rio RV. 2014. Characterization of shed medicinal leech  
879 mucus reveals a diverse microbiota. *Front Microbiol* 5:757.
- 880 36. Alexiev A, Oliverio AM, Prest TL, Korpita TM, McKenzie VJ, Song SJ, Di Fiore A,  
881 Seguin-Orlando A, Feh C, Mendelson JR, Sanders J, Knight R, Delsuc F, Amato KR,  
882 Metcalf JL, Orlando L, Kowalewski M, Avenant NL, Link A. 2017. The Effects of  
883 Captivity on the Mammalian Gut Microbiome. *Integr Comp Biol* 57:690-704.
- 884 37. Nelson MC, Morrison HG, Benjamino J, Grim SL, Graf J. 2014. Analysis, optimization  
885 and verification of Illumina-generated 16S rRNA gene amplicon surveys. *PLoS ONE*  
886 9:e94249.
- 887 38. Pruesse E, Quast C, Knittel K, Fuchs BM, Ludwig W, Peplies J, Glöckner FO. 2007.  
888 SILVA: a comprehensive online resource for quality checked and aligned ribosomal  
889 RNA sequence data compatible with ARB. *Nucleic Acids Res* 35:7188-7196.

- 890 39. Kohl KD, Dearing MD. 2014. Wild-caught rodents retain a majority of their natural gut  
891 microbiota upon entrance into captivity. *Environ Microbiol Reports* 6:191-5.
- 892 40. Silver AC, Kikuchi Y, Fadl AA, Sha J, Chopra AK, Graf J. 2007. Interaction between  
893 innate immune cells and a bacterial type III secretion system in mutualistic and  
894 pathogenic associations. *Proc Natl Acad Sci USA* 104:9481-9486.
- 895 41. Clark MA, Moran NA, Baumann P, Wernegreen JJ. 2000. Cospeciation between bacterial  
896 endosymbionts (*Buchnera*) and a recent radiation of aphids (*Uroleucon*) and pitfalls of  
897 testing for phylogenetic congruence. *Evolution* 54:517-25.
- 898 42. Moeller AH, Li Y, Mpoudi Ngole E, Ahuka-Mundeke S, Lonsdorf EV, Pusey AE,  
899 Peeters M, Hahn BH, Ochman H. 2014. Rapid changes in the gut microbiome during  
900 human evolution. *Proc Natl Acad Sci USA* doi:10.1073/pnas.1419136111:201419136.
- 901 43. Chandler JA, Morgan Lang J, Bhatnagar S, Eisen JA, Kopp A. 2011. Bacterial  
902 Communities of Diverse *Drosophila* Species: Ecological Context of a Host–Microbe  
903 Model System. *PLOS Genetics* 7:e1002272.
- 904 44. Brune A, Dietrich C. 2015. The Gut Microbiota of Termites: Digesting the Diversity in  
905 the Light of Ecology and Evolution. *Annu Rev Microbiol* 69:145-166.
- 906 45. Roeselers G, Mittge EK, Stephens WZ, Parichy DM, Cavanaugh CM, Guillemin K,  
907 Rawls JF. 2011. Evidence for a core gut microbiota in the zebrafish. *ISME J* 5:1595-608.
- 908 46. Wang Y, Gilbreath TM, Kukutla P, Yan G, Xu J. 2011. Dynamic gut microbiome across  
909 life history of the malaria mosquito *Anopheles gambiae* in Kenya. *PLoS ONE* 6:e24767.
- 910 47. Aksoy S. 2000. Tsetse--A haven for microorganisms. *Parasitol Today* 16:114-8.
- 911 48. Strand MR. 2018. Composition and functional roles of the gut microbiota in mosquitoes.  
912 *Curr Opin Insect Sci* 28:59-65.



- 913 49. Zepeda Mendoza ML, Xiong Z, Escalera-Zamudio M, Runge AK, Thézé J, Streicker D,  
914 Frank HK, Loza-Rubio E, Liu S, Ryder OA, Samaniego Castruita JA, Katzourakis A,  
915 Pacheco G, Taboada B, Löber U, Pybus OG, Li Y, Rojas-Anaya E, Bohmann K,  
916 Carmona Baez A, Arias CF, Liu S, Greenwood AD, Bertelsen MF, White NE, Bunce M,  
917 Zhang G, Sicheritz-Pontén T, Gilbert MPT. 2018. Hologenomic adaptations underlying  
918 the evolution of sanguivory in the common vampire bat. *Nat Ecol Evol* 2:659-668.
- 919 50. Michel AJ, Ward LM, Goffredi SK, Dawson KS, Baldassarre DT, Brenner A, Gotanda  
920 KM, McCormack JE, Mullin SW, O'Neill A, Tender GS, Uy JAC, Yu K, Orphan VJ,  
921 Chaves JA. 2018. The gut of the finch: uniqueness of the gut microbiome of the  
922 Galápagos vampire finch. *Microbiome* 6:167-167.
- 923 51. Siddall ME, Barkdull M, Tessler M, Brugler MR, Borda E, Hekkala E. 2019. Ideating  
924 iDNA: Lessons and limitations from leeches in legacy collections. *PLOS ONE*  
925 14:e0212226.
- 926 52. Colston SM, Fullmer MS, Beka L, Lamy B, Gogarten JP, Graf J. 2014. Bioinformatic  
927 genome comparisons for taxonomic and phylogenetic assignments using *Aeromonas* as a  
928 test case. *mBio* 5:e02136.
- 929 53. Morandi A, Zhaxybayeva O, Gogarten JP, Graf J. 2005. Evolutionary and Diagnostic  
930 Implications of Intragenomic Heterogeneity in the 16S rRNA Gene in *Aeromonas*  
931 Strains. *J Bacteriol* 187:6561-6564.
- 932 54. Silver AC, Rabinowitz NM, Kuffer S, Graf J. 2007. Identification of *Aeromonas veronii*  
933 genes required for colonization of the medicinal leech, *Hirudo verbana*. *J Bacteriol*  
934 189:6763-72.

- 935 55. Bomar L, Graf J. 2012. Investigation into the physiologies of *Aeromonas veronii* *in vitro*  
936 and inside the digestive tract of the medicinal leech using RNA-seq. Biol Bull 223:155-  
937 66.
- 938 56. Maltz M, LeVarge B, Graf J. 2015. Identification of iron and heme utilization genes in  
939 *Aeromonas* and their role in the colonization of the leech digestive tract. Front Microbiol  
940 6:763.
- 941 57. Sogin ML, Morrison HG, Huber JA, Welch DM, Huse SM, Neal PR, Arrieta JM, Herndl  
942 GJ. 2006. Microbial diversity in the deep sea and the underexplored "rare biosphere".  
943 Proc Natl Acad Sci USA 103:12115-12120.
- 944 58. Benjamino J, Lincoln S, Srivastava R, Graf J. 2018. Low-abundant bacteria drive  
945 compositional changes in the gut microbiota after dietary alteration. Microbiome 6:86.
- 946 59. Jousset A, Bienhold C, Chatzinotas A, Gallien L, Gobet A, Kurm V, Küsel K, Rillig MC,  
947 Rivett DW, Salles JF, van der Heijden MGA, Youssef NH, Zhang X, Wei Z, Hol WHG.  
948 2017. Where less may be more: how the rare biosphere pulls ecosystems strings. The  
949 ISME Journal 11:853-862.
- 950 60. Meyer KM, Memiaghe H, Korte L, Kenfack D, Alonso A, Bohannan BJM. 2018. Why  
951 do microbes exhibit weak biogeographic patterns? The ISME Journal 12:1404-1413.
- 952 61. Woodcock S, Curtis TP, Head IM, Lunn M, Sloan WT. 2006. Taxa-area relationships for  
953 microbes: the unsampled and the unseen. Ecol Lett 9:805-12.
- 954 62. Indergand S, Graf J. 2000. Ingested blood contributes to the specificity of the symbiosis  
955 of *Aeromonas veronii* biovar *sobria* and *Hirudo medicinalis*, the medicinal leech. Appl  
956 Environ Microbiol 66:4735-4741.

- 957 63. Vasai F, Brugirard Ricaud K, Bernadet MD, Cauquil L, Bouchez O, Combes S, Davail S.  
958 2014. Overfeeding and genetics affect the composition of intestinal microbiota in *Anas*  
959 *platyrhynchos* (Pekin) and *Cairina moschata* (Muscovy) ducks. FEMS Microbiol Ecol  
960 87:204-16.
- 961 64. Costello EK, Gordon JI, Secor SM, Knight R. 2010. Postprandial remodeling of the gut  
962 microbiota in Burmese pythons. The ISME journal 4:1375-1385.
- 963 65. Tasiemski A, Massol F, Cuvillier-Hot V, Boidin-Wichlacz C, Roger E, Rodet F, Fournier  
964 I, Thomas F, Salzet M. 2015. Reciprocal immune benefit based on complementary  
965 production of antibiotics by the leech *Hirudo verbana* and its gut symbiont *Aeromonas*  
966 *veronii*. Sci Rep 5:17498.
- 967 66. Carey HV, Walters WA, Knight R. 2013. Seasonal restructuring of the ground squirrel  
968 gut microbiota over the annual hibernation cycle. Am J Physiol Regul Integr Comp  
969 Physiol 304:R33-R42.
- 970 67. Ott BM, Beka L, Graf J, Rio RV. 2015. Draft Genome Sequence of *Pedobacter* sp. Strain  
971 Hv1, an Isolate from Medicinal Leech Mucosal Castings. Genome Announc 3.
- 972 68. Silver AC, Williams D, Faucher J, Horneman AJ, Gogarten JP, Graf J. 2011. Complex  
973 evolutionary history of the *Aeromonas veronii* group revealed by host interaction and  
974 DNA sequence data. PLoS One 6:e16751.
- 975 69. Mumcuoglu KY, Huberman L, Cohen R, Temper V, Adler A, Galun R, Block C. 2010.  
976 Elimination of symbiotic *Aeromonas* spp. from the intestinal tract of the medicinal leech,  
977 *Hirudo medicinalis*, using ciprofloxacin feeding. Clin Microbiol Infect 16:563-7.

- 978 70. Puchtler H, Waldrop FS, Meloan SN, Terry MS, Conner HM. 1970. Methacarn  
979 (methanol-Carnoy) fixation. Practical and theoretical considerations. *Histochemie* 21:97-  
980 116.
- 981 71. Schneider CA, Rasband WS, Eliceiri KW. 2012. NIH Image to ImageJ: 25 years of  
982 image analysis. *Nat Methods* 9:671-675.
- 983 72. Yu Z, Morrison M. 2004. Improved extraction of PCR-quality community DNA from  
984 digesta and fecal samples. *Biotechniques* 36:808-12.
- 985 73. Kozich JJ, Westcott SL, Baxter NT, Highlander SK, Schloss PD. 2013. Development of a  
986 Dual-Index Sequencing Strategy and Curation Pipeline for Analyzing Amplicon  
987 Sequence Data on the MiSeq Illumina Sequencing Platform. *Appl Environ Microbiol*  
988 79:5112-5120.
- 989 74. Larsbrink J, Rogers TE, Hemsworth GR, McKee LS, Tauzin AS, Spadiut O, Klintner S,  
990 Pudlo NA, Urs K, Koropatkin NM, Creagh AL, Haynes CA, Kelly AG, Cederholm SN,  
991 Davies GJ, Martens EC, Brumer H. 2014. A discrete genetic locus confers xyloglucan  
992 metabolism in select human gut Bacteroidetes. *Nature* doi:10.1038/nature12907.
- 993 75. McMurdie PJ, Holmes S. 2013. phyloseq: An R Package for Reproducible Interactive  
994 Analysis and Graphics of Microbiome Census Data. *PLOS ONE* 8:e61217.
- 995 76. Davis NM, Proctor DM, Holmes SP, Relman DA, Callahan BJ. 2018. Simple statistical  
996 identification and removal of contaminant sequences in marker-gene and metagenomics  
997 data. *Microbiome* 6:226.
- 998 77. Oksanen J, Blanchet FG, Friendly M, Kindt R, Legendre P, McGlinn D, Minchin PR,  
999 O'Hara RB, Simpson GL, Solymos P, Stevens MHH, Szoecs E, Wagner H. 2019. *vegan*:

1000 Community Ecology Package. R package version 2.5-5, [https://CRAN.R-](https://CRAN.R-project.org/package=vegan)  
 1001 [project.org/package=vegan](https://CRAN.R-project.org/package=vegan).  
 1002 78. Lozupone C, Knight R. 2005. UniFrac: a New Phylogenetic Method for Comparing  
 1003 Microbial Communities. *Appl Environ Microbiol* 71:8228-8235.

1004

1005

1006 TABLES

1007 Table 1. Average percent of total 16S rRNA V4 sequences of core and common OTUs in ILF  
 1008 and intestinum samples from *Hirudo verbana* and *Macrobdella decora*

1009

| Phylum              | Genus                  | <i>Hirudo verbana</i> |            | <i>Macrobdella decora</i> |            | Accession No. |
|---------------------|------------------------|-----------------------|------------|---------------------------|------------|---------------|
|                     |                        | ILF <sup>†</sup>      | Intestinum | ILF                       | Intestinum |               |
| Bacteroidetes       | Bacteroides            | 1.37%                 | 0.38%      | 39.82%                    | 40.48%     | SAMN11823292  |
|                     | Mucinivorans-like      | 0%                    | 8.89%      | 0%                        | 0%         | SAMN11823282  |
|                     | Millionella-like       | 0.35%                 | 9.79%      | 0%                        | 0.65%      | SAMN11823299  |
|                     | Mucinivorans           | 58.20%                | 16.83%     | 0%                        | 0.00%      | SAMN11823269  |
| Clostridia          | Alkaliphilus-like      | 0%                    | 1.11%      | 20.42%                    | 28.62%     | SAMN11823295  |
|                     | Clostridium            | 0%                    | 0%         | 2.78%                     | 0.50%      | SAMN11823294  |
|                     | Papillibacter-like     | 0%                    | 0%         | 2.71%                     | 1.15%      | SAMN11823296  |
|                     | Butyricicoccus         | 0%                    | 0%         | 18.51%                    | 6.70%      | SAMN11823293  |
| Alphaproteobacteria | Insolitospirillum-like | 0%                    | 21.02%     | 0%                        | 1.67%      | SAMN11823298  |
| Deltaproteobacteria | Desulfovibrio          | 0.71%                 | 6.15%      | 0.62%                     | 1.27%      | SAMN11823279  |
| Gammaproteobacteria | Aeromonas              | 18.07%                | 15.88%     | 8.10%                     | 9.15%      | SAMN11823291  |

1010

1011

1012

\* OTUs determined at the 97% confidence level. Those OTUs indicated as “-like” indicate the most closely-related genus listed in RDP.

† Core (present in ≥ 90% of samples) OTUs are highlighted in green. Common (present in ≥ 70% of samples) OTUs are highlighted in yellow. Core and common OTUS were determined for each species of leech and sampled organ individually.

1013

1014

1015

1016

1017

1018 Table 2. Presence of bladder OTUs in total 16S rRNA V4 sequences from *Macrobdella decora*

1019 and *Hirudo verbana* bladder samples.

| Class               | Genus               | GenBank<br>Accession No. | <i>Hirudo verbana</i> |                  | <i>Macrobdella decora</i> |        |
|---------------------|---------------------|--------------------------|-----------------------|------------------|---------------------------|--------|
|                     |                     |                          | Median <sup>‡</sup>   | Max <sup>§</sup> | Median                    | Max    |
| Alphaproteobacteria | Ochrobactrum        | SAMN11823287             | 15.46%                | 94.99%           | 0%                        | 12%    |
|                     | Ensifer             | ---                      | 0.18%                 | 13.18%           | 0.37%                     | 13.14% |
|                     | Aminobacter         | ---                      | 0.40%                 | 2.92%            | N.D.                      | N.D.   |
|                     | Azospirillum        | ---                      | N.D.                  | N.D.             | 15.13%                    | 28.86% |
|                     | Azospirillum        | SAMN11823283             | N.D.                  | N.D.             | 19.08%                    | 45.92% |
|                     | Phreatobacter-like  | SAMN11823288             | 0.86%                 | 9.52%            | 3.23%                     | 21.54% |
| Betaproteobacteria  | Methylopumilus-like | SAMN11823285             | N.D.                  | N.D.             | 6.68%                     | 17.40% |
|                     | Ramlibacter         | SAMN11823289             | 20.81%                | 75.62%           | 20.94%                    | 38.93% |
| Deltaproteobacteria | Bdellovibrio-like   | SAMN11823266             | 2.22%                 | 20.09%           | N.D.                      | N.D.   |
| Bacteroidetes       | Niabella            | SAMN11823286             | 0.63%                 | 9.20%            | N.D.                      | N.D.   |
|                     | Pedobacter          | SAMN11823267             | 18.48%                | 44.24%           | N.D.                      | N.D.   |

1020

1021

1022

1023

1024

1025

<sup>‡</sup> Median percentage of total 16S V4 rRNA sequences, when OTU is present. Core (present in  $\geq 90\%$  of samples) OTUs are highlighted in green.

<sup>§</sup> Maximum percentage of total 16S V4 rRNA sequences.

1026

1027

1028

1029

1030

1031 Supplemental Table 1. Number of samples collected of each sample type for this study. Only one  
1032 sample of each sample type was collected per animal, however multiple sample types were often  
1033 collected from the same animal. A total of 36 *Hirudo verbana* and 52 *Macrobdella decora*  
1034 animals were used in this study.

1035

|        | ILF              |                   | Intestinum       |                   | Bladder          |                   |
|--------|------------------|-------------------|------------------|-------------------|------------------|-------------------|
| Da1F** | <i>M. decora</i> | <i>H. verbana</i> | <i>M. decora</i> | <i>H. verbana</i> | <i>M. decora</i> | <i>H. verbana</i> |
| 0      | 17               | 10                | 15               | 2                 | 8                | 2                 |
| 1      | 6                | –                 | 6                | –                 | 2                | –                 |
| 2      | 2                | 6                 | 2                | –                 | –                | 1                 |
| 4      | 6                | 4                 | 9                | –                 | 4                | –                 |
| 7      | 9                | 8                 | 9                | –                 | 3                | –                 |
| 30     | 7                | –                 | 4                | –                 | 2                | –                 |
| 90+    | 5                | 8                 | –                | 7                 | 1                | 9                 |

1036

1037 Supplemental Table 2. See Excel

1038

1039

1040

1041

1042

---

\*\* Days after first laboratory-administered, sheep blood meal

1043

1044

1045

1046

1047

1048 Supplemental Table 3. FISH probes used in this study

| <b>Probe</b> | <b>Nucleotide sequence<br/>(5'-3')</b> | <b>Reference</b>           | <b>Target Organism(s)</b>                                                                                   |
|--------------|----------------------------------------|----------------------------|-------------------------------------------------------------------------------------------------------------|
| ALF968       | GGTAAGGTTCTGCGCGTT                     | Neef (1997)                | Aminobacter, Insolitispirillum-like,<br>Ochrobactrum, Phreatobacter-like, Sphingomonas                      |
| BET42a       | GCCTTCCCACWTCGTTT                      | Manz <i>et al.</i> (1992)  | Achromobacter, Acidovorax, Pelomonas,<br>Ramlibacter, Variovorax                                            |
| CF319a       | TGGTCCGTGTCTCAGTAC                     | Manz <i>et al.</i> (1996)  | Bacteroides, Flavobacterium, Pedobacter,<br>Mucinivorans, (some) Phreatobacter-like, (some)<br>Bdellovibrio |
| AER66        | CTACTTTCCCGCTGCCGC                     | Kampfer (1996)             | Aeromonas                                                                                                   |
| Rhiz1244     | TCGCTGCCCACTGTCACC                     | Thayanukul (2010)          | Aminobacter, Ensifer, Phreatobacter-like, (some)<br>Ochrobactrum                                            |
| Eub338       | GCTGCCTCCCGTAGGAGT                     | Amann <i>et al.</i> (1990) | (most) Eubacteria                                                                                           |

1049

1050

1051

1052

1053

1054

1055

1056

1057

1058



1059

1060

1061

1062

1063

1064 FIGURES

1065

1066 Figure 1. Unifrac-calculated NMDS plot of leech-associated microbiota showing that the  
1067 microbiota is host species-specific at the genus level, but not at higher taxonomic levels. Two  
1068 leech species were sampled (*Hirudo verbana* = orange and *Macrobdella decora* = cyan) at three  
1069 organ sites (ILF = circle, intestinum = triangle, bladder = cross). A) When OTUs were calculated  
1070 at 97% sequence similarity (~Genus), 53% of the total variation between samples is described by  
1071 separating the two leech host species. B) When OTUs were calculated at 88% sequence  
1072 similarity (~Order), only 25% of the total variation between samples is described by separating  
1073 the two leech host species. Ellipses were calculated at 95% confidence.

1074

1075 Figure 2. Shannon Alpha-diversity showing the microbiome of *Macrobdella decora* ILF is more  
1076 diverse than that of *Hirudo verbana* but the opposite is true of the intestinum microbiomes.  
1077 Calculations for leech A) ILF and B) intestinum samples. All samples were collected before  
1078 feeding or greater than 28 days after feeding. Alpha diversity does not change between the ILF  
1079 and intestinum of wild-caught *M. decora* (grey) but increases in farm-raised *H. verbana* (white).

1080

1081 Figure 3. False-color FISH micrographs of *Macrobdella decora* bladder samples. From left to  
1082 right, columns contain images with probes DAPI (blue – Eukaryotic DNA), Eub338 (green –  
1083 Eubacteria), CF319a (white : Bacteroidetes – *Mucinivorans*, *Bacteroides*, *Niabella*, *Pedobacter*),  
1084 (red), and composite. From top to bottom, the fourth (red) column contains images with probes  
1085 Alf968 (Alphaproteobacteria – *Ochrobactrum*, *Azospirillum*, *Phreatobacter-like*), Bet42a  
1086 (Betaproteobacteria – *Methylopumilus-like*, *Ramlibacter*), Rhiz1244 (Rhizobiales –  
1087 *Ochrobactrum*, *Phreatobacter-like*), Aer66 (*Aeromonas*). The *M. decora* bladder is colonized in  
1088 a stratified manner with intracellular *Azospirillum*, epithelial-associated Betaproteobacteria, and  
1089 *Phreatobacter-like* and *Niabella* in the matrix. *Aeromonas* (red arrows) is present associated with  
1090 eukaryotic cells, suggesting that they have been carried here by leech hemocytes and are not  
1091 normal flora for the bladder. Bars = 10 $\mu$ m.

1092  
1093 Figure 4. Unifrac-calculated NMDS plot of wild-caught *Macrobdella decora* - associated  
1094 microbiota shows that month of collection affects gut microbiome. Animals were collected in  
1095 three seasons: late cold (April - light blue), warm (June - pink, July - red, August - brown, and  
1096 September - brown), and early cold (October - dark blue). A) ILF samples. ILF microbiota from  
1097 animals collected in October were significantly different from that of animals collected in April  
1098 or warm months. B) Intestinum samples. Intestinum microbiota from animals collected in April  
1099 were significantly different from that of animals collected in warm months or October. Ellipses  
1100 drawn at 95% confidence interval.

1101  
1102 Figure 5. Box and Whisker plot of leech-associated gut microbiota showing that the prevalence  
1103 of taxa in the ILF appears to be greatly affected within ~48h of a blood meal, while the

1104 prevalence of taxa in the intestinum maintains relative stability. The prevalence of 9 core gut  
1105 taxa from deep-sequenced microbiomes of A) *Hirudo verbana* ILF, B) *Macrobdella decora* ILF,  
1106 and C) *M. decora* intestinum were assessed at 7 time points after a blood meal (0, 1, 2, 4, 7, 30,  
1107 and 90+ days after feeding). See Supplemental Table 1 for number of samples analyzed at each  
1108 time point.

1109

1110 Figure 6. *Macrobdella decora* ILF diversity changes with time after feeding. A) Shannon  
1111 diversity index calculates a drop in ILF microbiome diversity by 2 days after feeding (DaF) that  
1112 rebounds by 7 – 30 DaF. B) Bray-curtis distance calculation shows that ILF microbiomes at 2 – 7  
1113 DaF are significantly different from those of unfed animals (0 DaF) and that the community  
1114 rebounds at 30 – 90 DaF. Note the appearance of two sub-populations of ILF samples that i)  
1115 appears to rebound by ~4 DaF and ii) appears to require > 7 DaF to rebound.

1116

1117 Figure 7. False-color FISH micrograph of *Macrobdella decora* ILF. From left to right, columns  
1118 contain images with probes DAPI (blue – Eukaryotic DNA), Eub338 (green – Eubacteria),  
1119 CF319a (white : Bacteroidetes – *Mucinivorans*, *Bacteroides*), Aer66 (red – *Aeromonas*), and  
1120 composite. From top to bottom, the rows contain images from animals sacrificed 0 days (wild-  
1121 caught animals), 4 days , and 7 days after a laboratory-administered sterile blood meal. Blue  
1122 arrows indicate eukaryotic cells (most likely leech hemocytes), green arrows indicate notable  
1123 bacteria, white arrows indicate Bacteroidetes microcolonies, and red arrows indicate *Aeromonas*.  
1124 Background fluorescence is from crop contents, especially the blood meal at 4 and 7 days. Few  
1125 bacteria are present in the crop of wild-caught, unfed animals. Bacteroidetes colony expansion  
1126 occurs by 4 days after feeding, while *Aeromonas* prevalence increases by 7 days after feeding.

1127 Other bacteria are present at 4 days after feeding, however their numbers appear to be  
1128 overwhelmed by Bacteroidetes and *Aeromonas* growth at 7 days after feeding. In animals 7 days  
1129 after feeding, *Aeromonas* occasionally are found associated with hemocytes. Bars = 10 $\mu$ m.

1130

1131 Sup Figure 1. Unifrac-calculated NMDS plot of wild-caught *Macrobdella decora* - associated  
1132 microbiota. Animals were collected from four states of the Northeastern U.S.A.: Connecticut  
1133 (orange), Massachusetts (cyan), New York (green), and Vermont (black). A) ILF samples show  
1134 no significant difference between ILF of *M. decora* from CT, MA, NY, and VT ( $p \geq 0.222$ ).  
1135 B) Intestinum samples from CT and MA are significantly different from each other ( $p = 0.006$ ).  
1136 Ellipses drawn at 95% confidence interval.

1137

1138

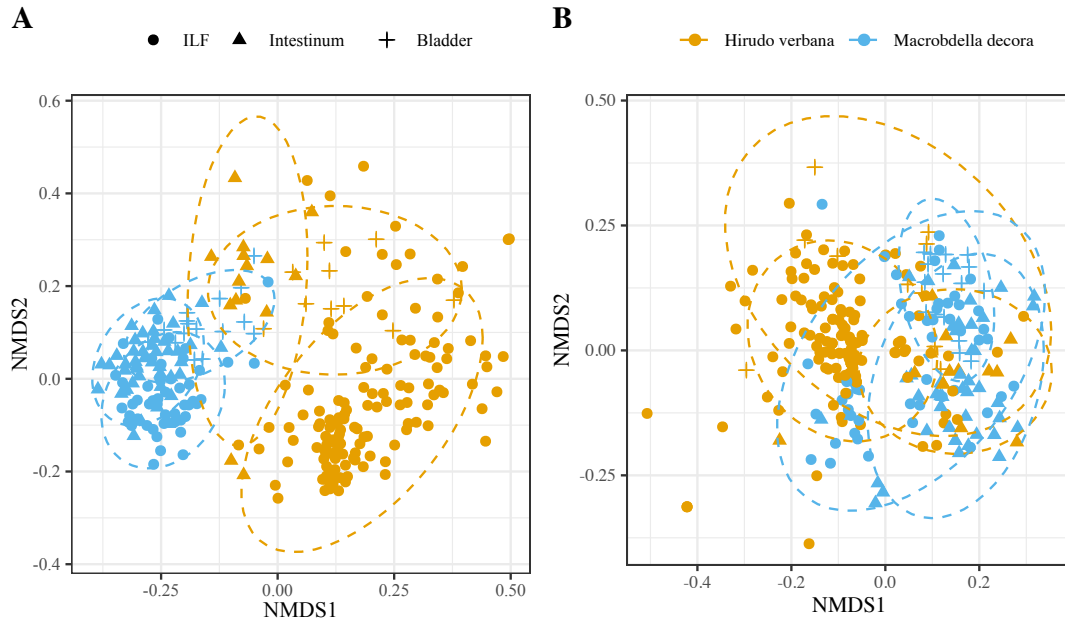

Figure 1: Unifrac-calculated NMDS plot of leech-associated microbiota showing that the microbiota is host species-specific at the genus level, but not at higher taxonomic levels. Two leech species were sampled (*Hirudo verbana* = orange and *Macrobdella decora* = cyan) at three organ sites (ILF = circle, intestine = triangle, bladder = cross). A) When OTUs were calculated at 97% sequence similarity (~Genus), 53% of the total variation between samples is described by separating the two leech host species. B) When OTUs were calculated at 88% sequence similarity (~Order), only 25% of the total variation between samples is described by separating the two leech host species. Ellipses calculated at 95% confidence.

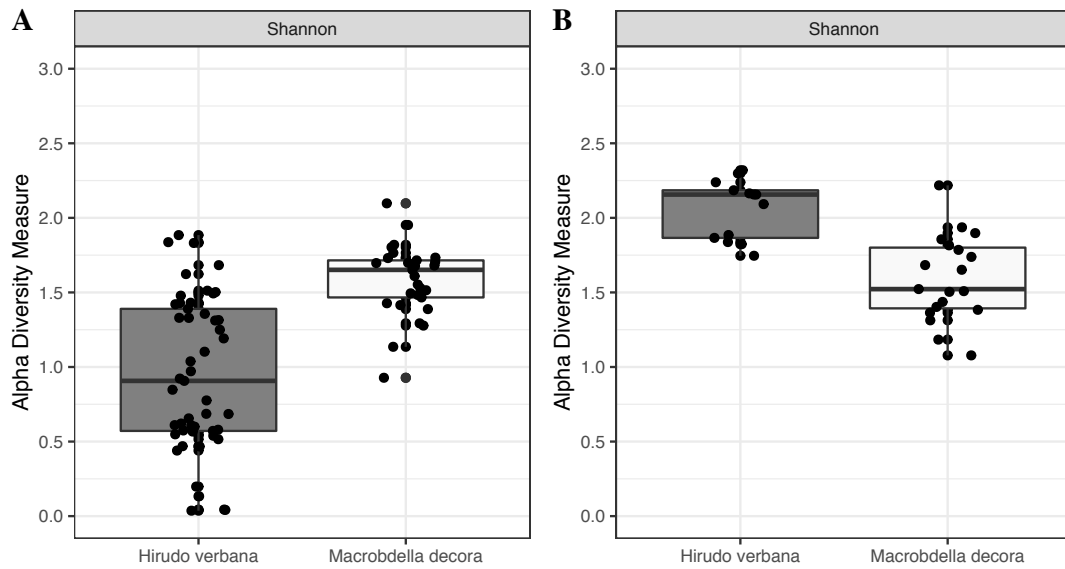

Figure 2: Shannon Alpha-diversity showing the microbiome of *Macrobdella decora* ILF is more diverse than that of *Hirudo verbana* but the opposite is true of the intestinum microbiomes. Calculations for leech A) ILF and B) intestinum samples. All samples were collected before feeding or greater than 28 days after feeding. Alpha diversity does not change between the ILF and intestinum of wild-caught *M. decora* (grey) but increases in farm-raised *H. verbana* (white).

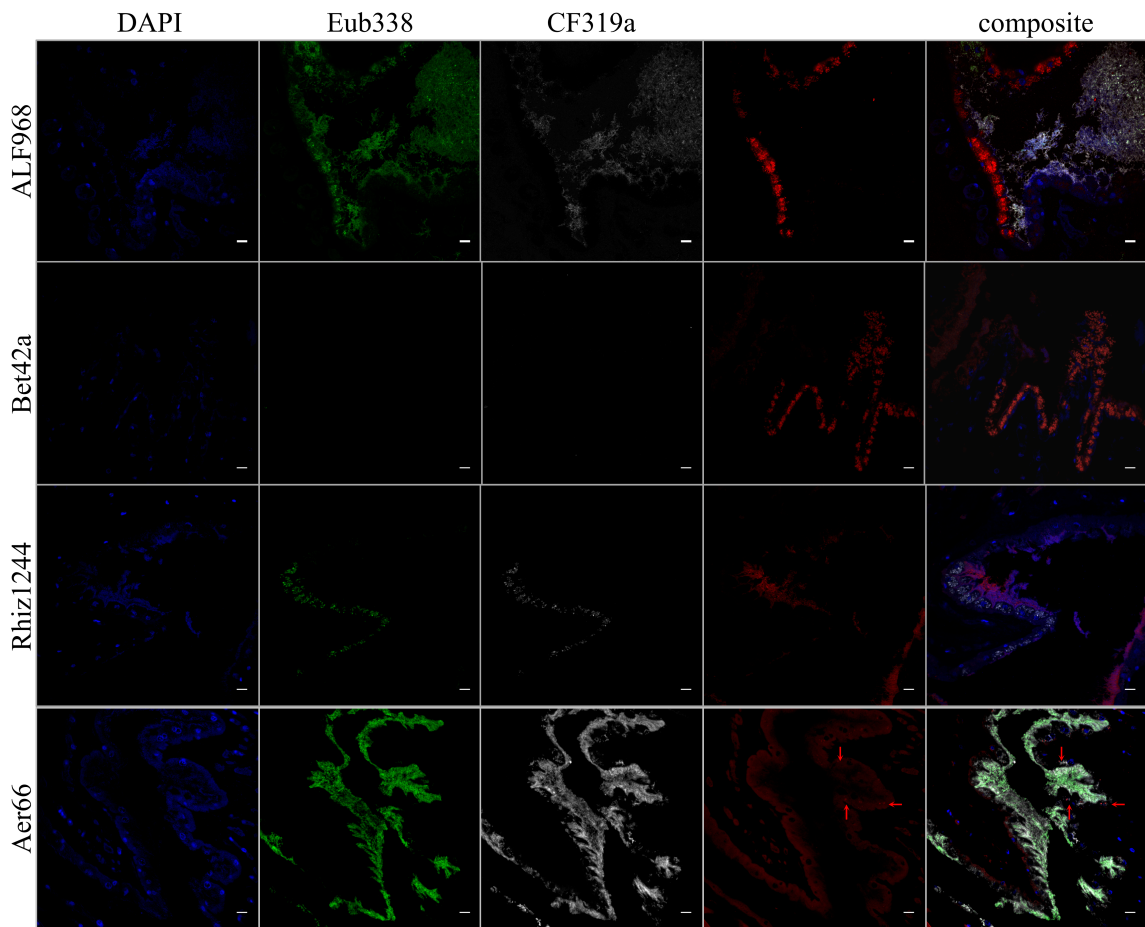

Figure 3: False-color FISH images of *Macrobodella decora* bladder samples. From left to right, columns contain images with probes DAPI (blue - Eukaryotic DNA), Eub338 (green - Eubacteria), CF319a (white : Bacteroidetes - *Mucinivorans*, *Bacteroides*, *Niabella*, *Pedobacter*), (red), and composite. From top to bottom, the fourth (red) column contains images with probes ALF968 (Alphaproteobacteria - *Ochrobactrum*, *Azospirillum*, *Phreatobacter*-like), Bet42a (Betaproteobacteria - *Methylopumilus*-like, *Ramlibacter*), Rhiz1244 (Rhizobiales - *Ochrobactrum*, *Phreatobacter*-like), Aer66 (*Aeromonas*). The *M. decora* bladder is colonized in a stratified manner with intracellular *Azospirillum*, epithelial-associated Betaproteobacteria, and *Phreatobacter*-like and *Niabella* in the matrix. *Aeromonas* (red arrows) is present associated with eukaryotic cells, suggesting that they have been carried here by leech hemocytes and are not normal flora for the bladder. Bars = 10 $\mu$ m.

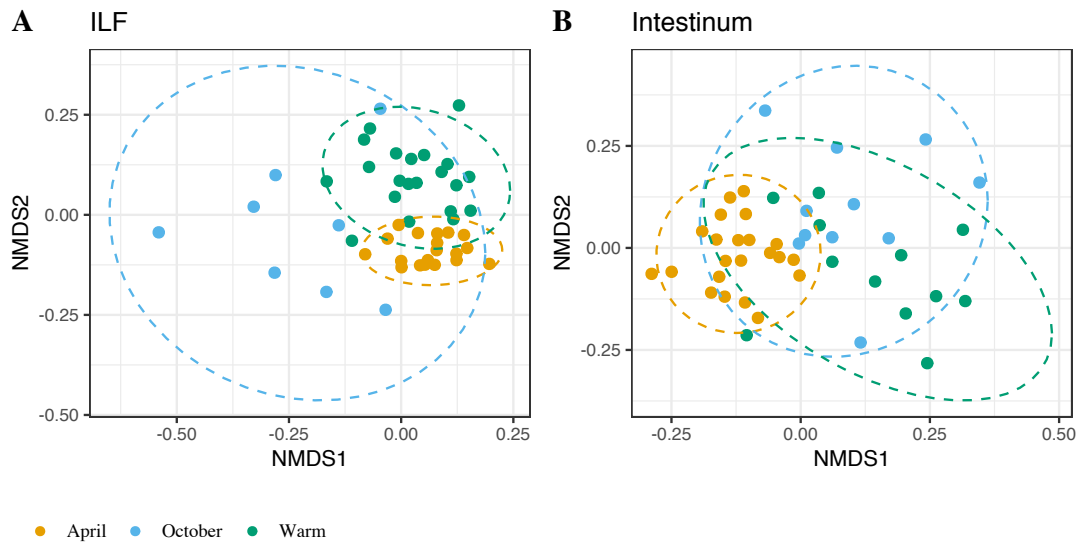

Figure 4: Unifrac-calculated NMDS plot of wild-caught *Macrobdella decora* - associated microbiota shows that month of collection affects gut microbiome. Animals were collected in three seasons: late cold (April - light blue), warm (June - pink, July - red, August - brown, and September - brown), and early cold (October - dark blue). A) ILF samples. ILF microbiota from animals collected in October were significantly different from that of animals collected in April or warm months. B) Intestinum samples. Intestinum microbiota from animals collected in April were significantly different from that of animals collected in warm months or October. Ellipses drawn at 95% confidence interval.



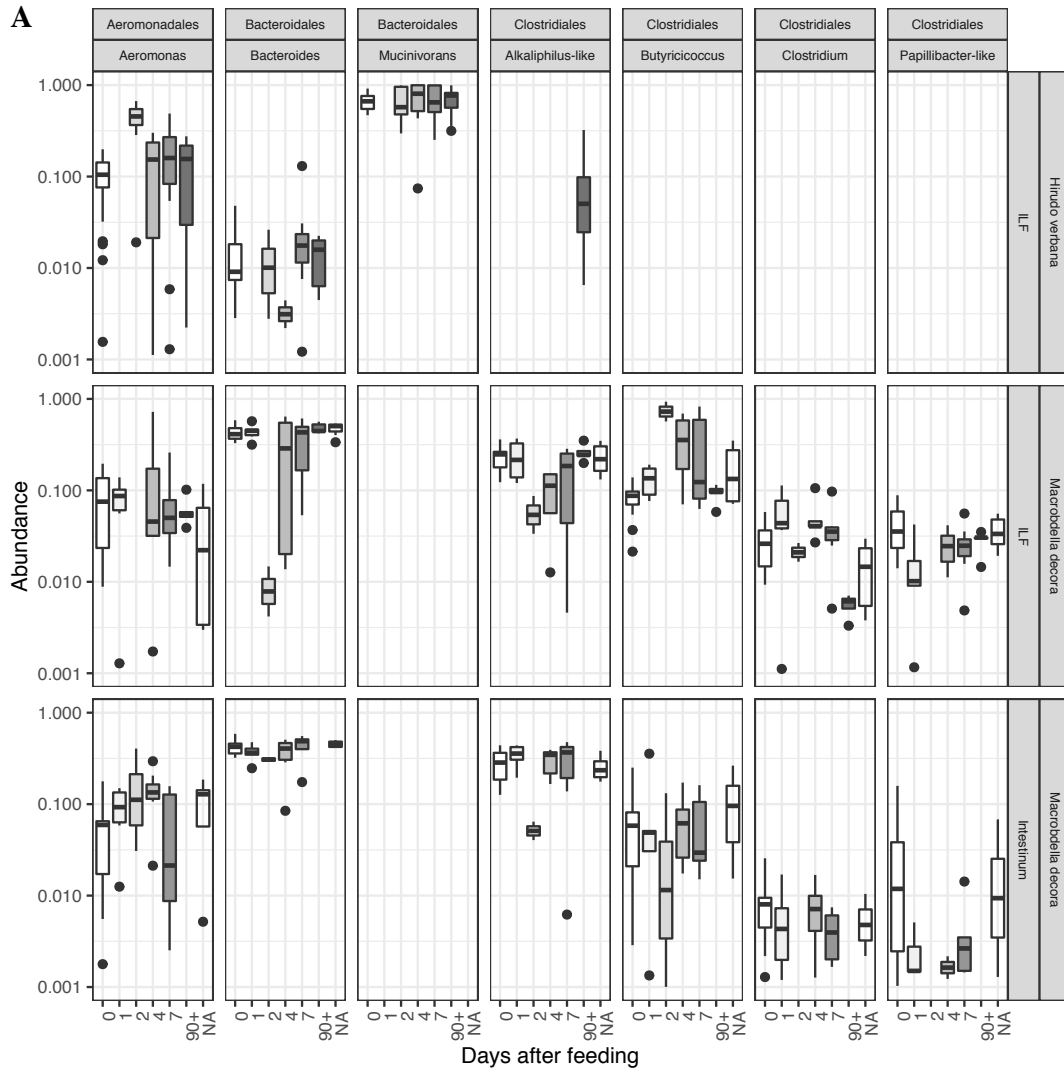

Figure 5: Box and Whisker plot of leech-associated gut microbiota showing that the prevalence of taxa in the ILF appears to be greatly affected within ~48h of a blood meal, while the prevalence of taxa in the intestine maintains relative stability. The prevalence of 9 core gut taxa from deep-sequenced microbiomes of A) *Hirudo verbana* ILF, B) *Macrobdella decora* ILF, and C) *M. decora* intestine were assessed at 7 time points after a blood meal (0, 1, 2, 4, 7, 30, and 90+ days after feeding). See Supplemental Table 1 for number of samples analyzed at each time point.

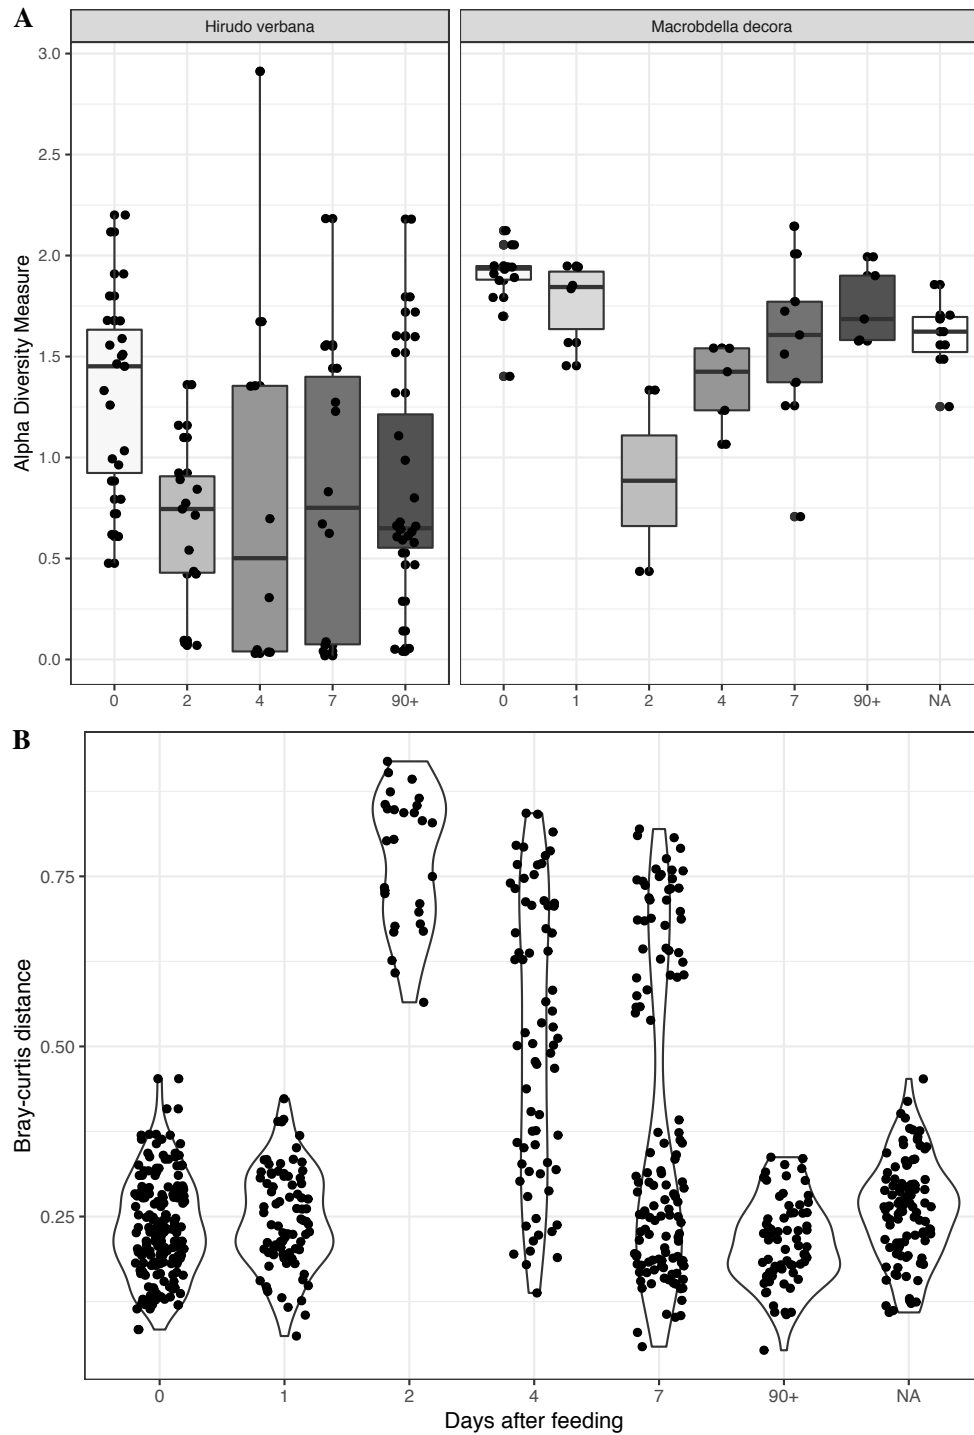

Figure 6: *Macrobdella decora* ILF diversity changes with time after feeding. A) Shannon diversity index calculates a drop in ILF microbiome diversity by 2 days after feeding (DaF) that rebounds by 7–30 DaF. B) Bray-curtis distance calculation shows that ILF microbiomes at 2–7 DaF are significantly different from those of unfed animals (0 DaF) and that the community rebounds at 30–90 DaF. Note the appearance of two sub-populations of ILF samples that i) appears to rebound by  $\sim 4$  DaF and ii) appears to require  $> 7$  DaF to rebound.

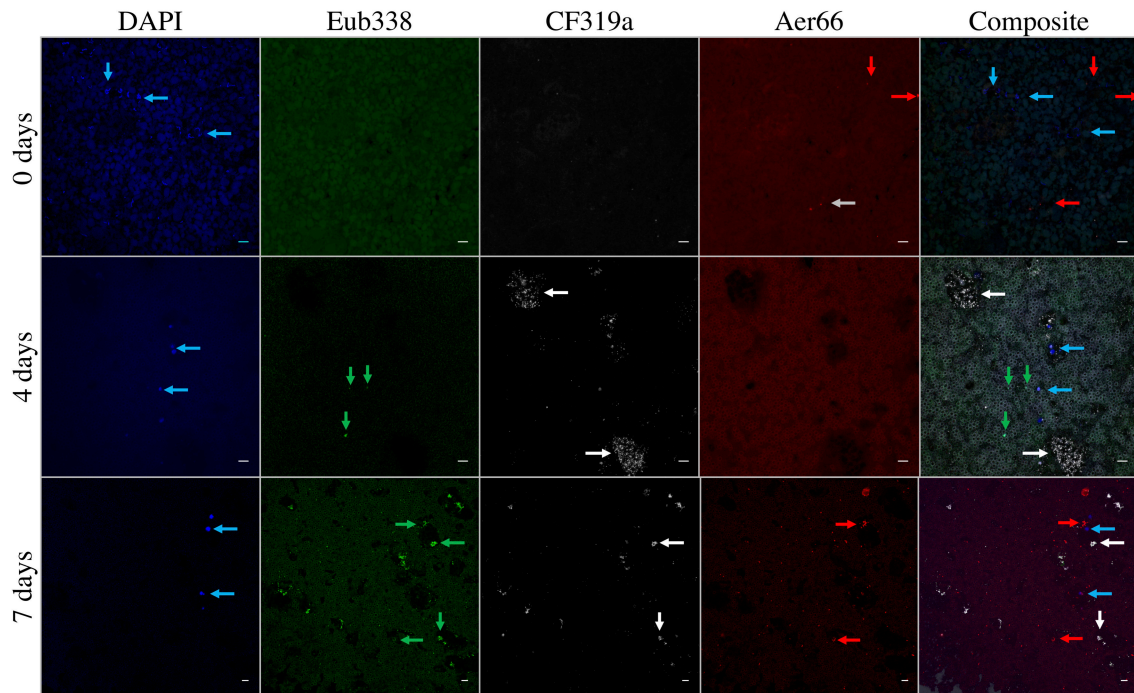

Figure 7: False-color FISH images of *Macrobodella decora* ILF. From left to right, columns contain images with probes DAPI (blue - Eukaryotic DNA), Eub338 (green - Eubacteria), CF319a (white : Bacteroidetes - *Mucinivorans*, *Bacteroides*), Aer66 (red - *Aeromonas*), and composite. From top to bottom, the rows contain images from animals sacrificed 0 days (wild-caught animals), 4 days , and 7 days after a laboratory-administered sterile blood meal. Blue arrows indicate eukaryotic cells (most likely leech hemocytes), green arrows indicate notable bacteria, white arrows indicate Bacteroidetes microcolonies, and red arrows indicate *Aeromonas*. Background fluorescence is from crop contents, especially the blood meal at 4 and 7 days. Few bacteria are present in the crop of wild-caught, unfed animals. Bacteroidetes colony expansion occurs by 4 days after feeding, while *Aeromonas* prevalence increases by 7 days after feeding. Other bacteria are present at 4 days after feeding, however their numbers appear to be overwhelmed by Bacteroidetes and *Aeromonas* growth at 7 days after feeding. In animals 7 days after feeding, *Aeromonas* occasionally are found associated with hemocytes. Bars = 10 $\mu$ m.
